# Supplementary material
Source: ML conference proceedings conference paper supplement (https://proceedings.neurips.cc/paper_files/paper/2023/hash/8ed3d610ea4b68e7afb30ea7d01422c6-Abstract.html)
Supplement: Supplementary file 1 [file 8ed3d610ea4b68e7afb30ea7d01422c6-Supplemental-Conference.pdf]

# Supplementary Materials

|     |                                                                                 |           |
|-----|---------------------------------------------------------------------------------|-----------|
| 366 | <b>A Proofs for the single layer case (Theorem 1)</b>                           | <b>12</b> |
| 367 | A.1 Rewriting the loss function . . . . .                                       | 12        |
| 368 | A.2 Warm-up: proof for the isotropic data . . . . .                             | 13        |
| 369 | A.3 Proof for the non-isotropic case . . . . .                                  | 15        |
| 370 | <b>B Proofs for the multi-layer case</b>                                        | <b>17</b> |
| 371 | B.1 Proof of Theorem 3 . . . . .                                                | 17        |
| 372 | B.2 Proof of Theorem 4 . . . . .                                                | 17        |
| 373 | B.3 Proof of Theorem 5 . . . . .                                                | 20        |
| 374 | B.4 Equivalence under permutation . . . . .                                     | 28        |
| 375 | <b>C Auxiliary Lemmas</b>                                                       | <b>29</b> |
| 376 | C.1 Reformulating the in-context loss . . . . .                                 | 29        |
| 377 | C.2 Proof of Lemma 2 (Equivalence to Preconditioned Gradient Descent) . . . . . | 31        |

## A Proofs for the single layer case (Theorem 1)

In this section, we prove our characterization of global minima for the single layer case (Theorem 1). We begin by simplifying the loss into a more concrete form.

### A.1 Rewriting the loss function

Recall the in-context loss  $f(P, Q)$  defined in (6):

$$f(P, Q) = \mathbf{E}_{Z_0, w_*} \left[ \left[ Z_0 + \frac{1}{n} \text{Attn}_{P, Q}(Z_0) \right]_{(d+1), (n+1)} + w_*^\top x^{(n+1)} \right]^2$$

Using the notation  $Z_0 = [z^{(1)} \ z^{(2)} \ \dots \ z^{(n+1)}]$ , one can rewrite  $Z_1$  as follows:

$$\begin{aligned} Z_1 &= Z_0 + \frac{1}{n} \text{Attn}_{P, Q}(Z_0) \\ &= [z^{(1)} \ \dots \ z^{(n+1)}] + \frac{1}{n} P [z^{(1)} \ \dots \ z^{(n+1)}] M \left( [z^{(1)} \ \dots \ z^{(n+1)}]^\top Q [z^{(1)} \ \dots \ z^{(n+1)}] \right). \end{aligned}$$

Thus, the last token of  $Z_1$  can be expressed as

$$z^{(n+1)} + \frac{1}{n} \sum_{i=1}^n P z^{(i)} (z^{(i)})^\top Q z^{(n+1)} = \begin{bmatrix} x^{(n+1)} \\ 0 \end{bmatrix} + \frac{1}{n} P \sum_{i=1}^n z^{(i)} z^{(i)\top} Q \begin{bmatrix} x^{(n+1)} \\ 0 \end{bmatrix},$$

where note that the summation is for  $i = 1, 2, \dots, n$  due to the mask matrix  $M$ . Letting  $b^\top$  be the last row of  $P$ , and  $A \in \mathbb{R}^{d+1, d}$  be the first  $d$  columns of  $Q$ , then  $f(P, Q)$  only depends on  $b, A$  and henceforth, we will write  $f(P, Q)$  as  $f(b, A)$ . Then,  $f(b, A)$  can be rewritten as

$$\begin{aligned} f(b, A) &= \mathbf{E}_{Z_0, w_*} \left[ b^\top \underbrace{\frac{1}{n} \sum_i z^{(i)} z^{(i)\top} A x^{(n+1)}} + w_*^\top x^{(n+1)} \right]^2 \\ &=: \mathbf{E}_{Z_0, w_*} \left[ b^\top \mathcal{M} A x^{(n+1)} + w_*^\top x^{(n+1)} \right]^2 = \mathbf{E}_{Z_0, w_*} \left[ (b^\top \mathcal{M} A + w_*^\top) x^{(n+1)} \right]^2, \end{aligned} \quad (13)$$

where we used the notation  $\mathcal{M} := \frac{1}{n} \sum_i z^{(i)} z^{(i)\top}$  to simplify. We now analyze the global minima of this loss function.

To illustrate the proof idea clearly, we begin with the proof for the simpler case of isotropic data.

## 391 A.2 Warm-up: proof for the isotropic data

392 As a warm-up, we first prove the result for the special case where  $x^{(i)}$  is sampled from  $\mathcal{N}(0, I_d)$  and  
 393  $w_\star$  is sampled from  $\mathcal{N}(0, I_d)$ .

### 394 Step 1: Decomposing the loss function into components

395 Writing  $A = [a_1 \ a_1 \ \cdots \ a_d]$ , and use the fact that  $\mathbf{E}[x^{(n+1)}[i]x^{(n+1)}[j]] = 0$  for  $i \neq j$ , we get

$$f(b, A) = \sum_{j=1}^d \mathbf{E}_{Z_0, w_\star} [b^\top \mathcal{M} a_j + w_\star[j]]^2 \mathbf{E}[x^{(n+1)}[j]^2] = \sum_{j=1}^d \mathbf{E}_{Z_0, w_\star} [b^\top \mathcal{M} a_j + w_\star[j]]^2.$$

396 Hence, we first focus on characterizing the global minima of each component in the summation  
 397 separately. To that end, let us formally define each component in the summation as follows.

$$\begin{aligned} f_j(b, A) &:= \mathbf{E}_{Z_0, w_\star} [b^\top \mathcal{M} a_j + w_\star[j]]^2 = \mathbf{E}_{Z_0, w_\star} [\text{Tr}(\mathcal{M} a_j b^\top) + w_\star[j]]^2 \\ &= \mathbf{E}_{Z_0, w_\star} [\langle \mathcal{M}, b a_j^\top \rangle + w_\star[j]]^2, \end{aligned}$$

398 where we use the notation  $\langle X, Y \rangle := \text{Tr}(XY^\top)$  for two matrices  $X$  and  $Y$  here and below.

### 399 Step 2: Characterizing global minima of each component

400 To characterize the global minima of each objective, we prove the following result.

401 **Lemma 6.** Suppose that  $x^{(i)}$  is sampled from  $\mathcal{N}(0, I_d)$  and  $w_\star$  is sampled from  $\mathcal{N}(0, I_d)$ . Consider  
 402 the following objective ( $\langle X, Y \rangle := \text{Tr}(XY^\top)$  for two matrices  $X$  and  $Y$ )

$$f_j(X) = \mathbf{E}_{Z_0, w_\star} [\langle \mathcal{M}, X \rangle + w_\star[j]]^2.$$

403 Then a global minimum is given as

$$X_j = -\frac{1}{\left(\frac{n-1}{n} + (d+2)\frac{1}{n}\right)} E_{d+1, j},$$

404 where  $E_{i_1, i_2}$  is the matrix whose  $(i_1, i_2)$ -th entry is 1, and the other entries are zero.

405 **Proof of Lemma 6.** Note first that  $f_j$  is convex in  $X$ . Hence, in order to show that a matrix  $X_0$  is  
 406 the global optimum of  $f_j$ , it suffices to show that the gradient vanishes at that point, in other words,

$$\nabla f_j(X_0) = 0.$$

407 To verify this, let us compute the gradient of  $f_j$ :

$$\nabla f_j(X_0) = 2\mathbf{E}[\langle \mathcal{M}, X_0 \rangle \mathcal{M}] + 2\mathbf{E}[w_\star[j] \mathcal{M}],$$

408 where we recall that  $\mathcal{M}$  is defined as

$$\mathcal{M} = \frac{1}{n} \sum_i \begin{bmatrix} x^{(i)} x^{(i)\top} & y^{(i)} x^{(i)} \\ y^{(i)} x^{(i)\top} & y^{(i)2} \end{bmatrix}.$$

409 To verify that the gradient is equal to zero, let us first compute  $\mathbf{E}[w_\star[j] \mathcal{M}]$ . For each  $i = 1, \dots, n$ ,  
 410 note that  $\mathbf{E}[w_\star[j] x^{(i)} x^{(i)\top}] = 0$  because  $\mathbf{E}[w_\star] = 0$ . Moreover,  $\mathbf{E}[w_\star[j] y^{(i)2}] = 0$  because  $w_\star$  is  
 411 symmetric, i.e.,  $w_\star \stackrel{d}{=} -w_\star$ , and  $y^{(i)} = \langle w_\star, x^{(i)} \rangle$ . Lastly, for  $k = 1, 2, \dots, d$ , we have

$$\mathbf{E}[w_\star[j] y^{(i)} x^{(i)}[k]] = \mathbf{E}[w_\star[j] \langle w_\star, x^{(i)} \rangle x^{(i)}[k]] = \mathbf{E}[w_\star[j]^2 x^{(i)}[j] x^{(i)}[k]] = \mathbb{1}_{[j=k]} \quad (14)$$

412 because  $\mathbf{E}[w_\star[i] w_\star[j]] = 0$  for  $i \neq j$ . Combining the above calculations, it follows that

$$\mathbf{E}[w_\star[j] \mathcal{M}] = E_{d+1, j} + E_{j, d+1}. \quad (15)$$

413 We now compute compute  $\mathbf{E}[\langle \mathcal{M}, E_{d+1, j} \rangle \mathcal{M}]$ . Note first that

$$\langle \mathcal{M}, E_{d+1, j} \rangle = \sum_i \langle w_\star, x^{(i)} \rangle x^{(i)}[j].$$

414 Hence, it holds that

$$\mathbf{E} \left[ \langle \mathcal{M}, E_{d+1,j} \rangle \left( \sum_i x^{(i)} x^{(i)\top} \right) \right] = \mathbf{E} \left[ \left( \sum_i \langle w_\star, x^{(i)} \rangle x^{(i)}[j] \right) \left( \sum_i x^{(i)} x^{(i)\top} \right) \right] = O.$$

415 because  $\mathbf{E}[w_\star] = 0$ . Next, we have

$$\mathbf{E} \left[ \langle \mathcal{M}, E_{d+1,j} \rangle \left( \sum_i y^{(i)2} \right) \right] = \mathbf{E} \left[ \left( \sum_i \langle w_\star, x^{(i)} \rangle x^{(i)}[j] \right) \left( \sum_i y^{(i)2} \right) \right] = 0$$

416 because  $w_\star \stackrel{d}{=} -w_\star$ . Lastly, we compute

$$\mathbf{E} \left[ \langle \mathcal{M}, E_{d+1,j} \rangle \left( \sum_i y^{(i)} x^{(i)\top} \right) \right].$$

417 To that end, note that for  $j \neq j'$ ,

$$\mathbf{E} \left[ \langle w_\star, x^{(i)} \rangle x^{(i)}[j] \langle w_\star, x^{(i')} \rangle x^{(i')}[j'] \right] = \begin{cases} \mathbf{E}[\langle x^{(i)}, x^{(i')} \rangle x^{(i)}[j] x^{(i')}[j']] = 0 & \text{if } i \neq i', \\ \mathbf{E}[\|x^{(i)}\|^2 x^{(i)}[j] x^{(i)}[j']] = 0 & \text{if } i = i', \end{cases}$$

418 and

$$\mathbf{E} \left[ \langle w_\star, x^{(i)} \rangle x^{(i)}[j] \langle w_\star, x^{(i')} \rangle x^{(i')}[j] \right] = \begin{cases} \mathbf{E}[x^{(i)}[j]^2 x^{(i')}[j]^2] = 1 & \text{if } i \neq i', \\ \mathbf{E}[\langle w_\star, x^{(i)} \rangle^2 x^{(i)}[j]^2] = d + 2 & \text{if } i = i', \end{cases} \quad (16)$$

419 where the last case follows from the fact that the 4th moment of Gaussian is 3 and

$$\mathbf{E} \left[ \langle w_\star, x^{(i)} \rangle^2 x^{(i)}[j]^2 \right] = \mathbf{E} \left[ \|x^{(i)}\|^2 x^{(i)}[j]^2 \right] = 3 + d - 1 = d + 2.$$

420 Combining the above calculations together, we arrive at

$$\begin{aligned} \mathbf{E} [\langle \mathcal{M}, E_{d+1,j} \rangle \mathcal{M}] &= \frac{1}{n^2} \cdot (n(n-1) + (d+2)n) (E_{d+1,j} + E_{j,d+1}) \\ &= \left( \frac{n-1}{n} + (d+2)\frac{1}{n} \right) (E_{d+1,j} + E_{j,d+1}). \end{aligned} \quad (17)$$

421 Therefore, combining (15) and (17), the results follows.  $\square$

### 422 **Step 3: Combining global minima of each component**

423 Now we finish the proof. From Lemma 6, it follows that

$$X_j = -\frac{1}{\left(\frac{n-1}{n} + (d+2)\frac{1}{n}\right)} E_{d+1,j},$$

424 is the unique global minimum of  $f_j$ . Hence,  $b$  and  $A = [a_1 \ a_1 \ \cdots \ a_d]$  achieve the global minimum

425 of  $f(b, A) = \sum_{j=1}^d f_j(b, A_j)$  if they satisfy

$$ba_j^\top = -\frac{1}{\left(\frac{n-1}{n} + (d+2)\frac{1}{n}\right)} E_{d+1,j} \quad \text{for all } i = 1, 2, \dots, d.$$

426 This can be achieve by the following choice:

$$b^\top = \mathbf{e}_{d+1}, \quad a_j = -\frac{1}{\left(\frac{n-1}{n} + (d+2)\frac{1}{n}\right)} \mathbf{e}_j \quad \text{for } i = 1, 2, \dots, d,$$

427 where  $\mathbf{e}_j$  is the  $j$ -th coordinate vector. This choice precisely corresponds to

$$b = \mathbf{e}_{d+1}, \quad A = -\frac{1}{\left(\frac{n-1}{n} + (d+2)\frac{1}{n}\right)} \begin{bmatrix} I_d \\ 0 \end{bmatrix}.$$

**Proof of uniqueness:** Suppose  $X_1$  and  $X_2$  are two minimizers of  $f_j$ , then  $\langle \mathcal{M}, X_1 \rangle = \langle \mathcal{M}, X_2 \rangle$  almost surely for all  $\mathcal{M}$ . If  $\langle \mathcal{M}, X_1 \rangle \neq \langle \mathcal{M}, X_2 \rangle$ , then  $f_j(\frac{1}{2}X_1 + \frac{1}{2}X_2) < \min f_j$  holds since the 1-dimensional quadratic function is strongly convex in its input. This concludes that the minimizer of  $f_j$  are a linear combination of  $E_{j,d+1}$  with its transpose. Since the constraint  $X = ba_j^\top$  ensures  $X$  is rank-one, then there are two possible solutions for  $X$ :  $E_{j,d+1}$  or  $E_{d+1,j}$ . Given  $b$  is shared among all  $f_j$ , the only unique solution for  $X$  is  $E_{d+1,j}$ . This ensures the uniqueness of solutions for  $b$  and  $a_j$  up to scaling.

We next move on to the non-isotropic case.

### A.3 Proof for the non-isotropic case

#### Step 1: Diagonal covariance case

We first consider the case where  $x^{(i)}$  is sampled from  $\mathcal{N}(0, \Lambda)$  where  $\Lambda = \text{diag}(\lambda_1, \dots, \lambda_d)$  and  $w_\star$  is sampled from  $\mathcal{N}(0, I_d)$ . We prove the following generalization of Lemma 6.

**Lemma 8.** Suppose that  $x^{(i)}$  is sampled from  $\mathcal{N}(0, \Lambda)$  where  $\Lambda = \text{diag}(\lambda_1, \dots, \lambda_d)$  and  $w_\star$  is sampled from  $\mathcal{N}(0, I_d)$ . Consider the following objective

$$f_j(X) = \mathbf{E}_{Z_0, w_\star} [\langle \mathcal{M}, X \rangle + w_\star[j]]^2.$$

Then a global minimum is given as

$$X_j = -\frac{1}{\frac{n+1}{n}\lambda_j + \frac{1}{n} \cdot (\sum_k \lambda_k)} E_{d+1,j},$$

where  $E_{i_1, i_2}$  is the matrix whose  $(i_1, i_2)$ -th entry is 1, and the other entries are zero.

**Proof of Lemma 8.** Similarly to the proof of Lemma 6, it suffices to check that

$$2\mathbf{E}[\langle \mathcal{M}, X_0 \rangle \mathcal{M}] + 2\mathbf{E}[w_\star[j] \mathcal{M}] = 0,$$

where we recall that  $\mathcal{M}$  is defined as

$$\mathcal{M} = \frac{1}{n} \sum_i \begin{bmatrix} x^{(i)} x^{(i)\top} & y^{(i)} x^{(i)} \\ y^{(i)} x^{(i)\top} & y^{(i)2} \end{bmatrix}.$$

A similar calculation as the proof of Lemma 6 yields

$$\mathbf{E}[w_\star[j] \mathcal{M}] = \lambda_j (E_{d+1,j} + E_{j,d+1}). \quad (18)$$

Here the factor of  $\lambda_j$  comes from the following generalization of (14):

$$\mathbf{E}[w_\star[j] y^{(i)} x^{(i)}[k]] = \mathbf{E}[w_\star[j] \langle w_\star, x^{(i)} \rangle x^{(i)}[k]] = \mathbf{E}[w_\star[j]^2 x^{(i)}[j] x^{(i)}[k]] = \lambda_j \mathbb{1}_{[j=k]}.$$

Next, we compute  $\mathbf{E}[\langle \mathcal{M}, E_{d+1,j} \rangle \mathcal{M}]$ . Again, we follow a similar calculation to the proof of Lemma 6 except that this time we use the following generalization of (16):

$$\mathbf{E}[\langle w_\star, x^{(i)} \rangle x^{(i)}[j] \langle w_\star, x^{(i')} \rangle x^{(i')}[j]] = \begin{cases} \mathbf{E}[x^{(i)}[j]^2 x^{(i')}[j]^2] = \lambda_j^2 & \text{if } i \neq i', \\ \mathbf{E}[\langle w_\star, x^{(i)} \rangle^2 x^{(i)}[j]^2] = \lambda_j \sum_k \lambda_k + 2\lambda_j^2 & \text{if } i = i', \end{cases}$$

where the last line follows since

$$\begin{aligned} \mathbf{E}[\langle w_\star, x^{(i)} \rangle^2 x^{(i)}[j]^2] &= \mathbf{E}[\|x^{(i)}\|^2 x^{(i)}[j]^2] = \mathbf{E}\left[x^{(i)}[j]^2 \sum_k x^{(i)}[k]^2\right] \\ &= \lambda_j \sum_k \lambda_k + 2\lambda_j^2. \end{aligned}$$

Therefore, we have

$$\begin{aligned} \mathbf{E}[\langle \mathcal{M}, E_{d+1,j} \rangle \mathcal{M}] &= \frac{1}{n^2} \cdot \left( n(n-1)\lambda_j^2 + n\lambda_j \sum_k \lambda_k + 2n\lambda_j^2 \right) (E_{d+1,j} + E_{j,d+1}) \\ &= \left( \frac{n+1}{n}\lambda_j^2 + \frac{1}{n}(\lambda_j \sum_k \lambda_k) \right) (E_{d+1,j} + E_{j,d+1}). \end{aligned} \quad (19)$$

Therefore, combining (18) and (19), the results follows.  $\square$

453 Now we finish the proof. From Lemma 6, it follows that

$$X_j = -\frac{1}{\frac{n+1}{n}\lambda_j + \frac{1}{n} \cdot (\sum_k \lambda_k)} E_{d+1,j}$$

454 is the unique global minimum of  $f_j$ . Hence,  $b$  and  $A = [a_1 \ a_1 \ \cdots \ a_d]$  achieve the global minimum  
455 of  $f(b, A) = \sum_{j=1}^d f_j(b, A_j)$  if they satisfy

$$ba_j^\top = X_j = -\frac{1}{\frac{n+1}{n}\lambda_j + \frac{1}{n} \cdot (\sum_k \lambda_k)} E_{d+1,j} \quad \text{for all } i = 1, 2, \dots, d.$$

456 This can be achieved by the following choice:

$$b^\top = \mathbf{e}_{d+1}, \quad a_j = -\frac{1}{\frac{n+1}{n}\lambda_j + \frac{1}{n} \cdot (\sum_k \lambda_k)} \mathbf{e}_j \quad \text{for } i = 1, 2, \dots, d,$$

457 where  $\mathbf{e}_j$  is the  $j$ -th coordinate vector. This choice precisely corresponds to

$$b = \mathbf{e}_{d+1}, \quad A = -\begin{bmatrix} \text{diag} \left( \left\{ \frac{1}{\frac{n+1}{n}\lambda_j + \frac{1}{n} \cdot (\sum_k \lambda_k)} \right\}_j \right) \\ 0 \end{bmatrix}.$$

## 458 **Step 2: Non-diagonal covariance case (the setting of Theorem 1)**

459 We finally prove the general result of Theorem 1, namely  $x^{(i)}$  is sampled from a Gaussian with  
460 covariance  $\Sigma = U\Lambda U^\top$  where  $\Lambda = \text{diag}(\lambda_1, \dots, \lambda_d)$  and  $w_\star$  is sampled from  $\mathcal{N}(0, I_d)$ . The  
461 proof works by reducing this case to the previous case. For each  $i$ , define  $\tilde{x}^{(i)} := U^\top x^{(i)}$ . Then  
462  $\mathbf{E}[\tilde{x}^{(i)}(\tilde{x}^{(i)})^\top] = \mathbf{E}[U^\top(U\Lambda U^\top)U] = \Lambda$ . Now let us write the loss function (13) with this new  
463 coordinate system: since  $x^{(i)} = U\tilde{x}^{(i)}$ , we have

$$f(b, A) = \mathbf{E}_{Z_0, w_\star} \left[ (b^\top \mathcal{M}A + w_\star^\top) U \tilde{x}^{(n+1)} \right]^2 = \sum_{j=1}^d \lambda_j \mathbf{E}_{Z_0, w_\star} \left[ ((b^\top \mathcal{M}A + w_\star^\top) U) [j] \right]^2.$$

464 Hence, let us consider the vector  $(b^\top \mathcal{M}A + w_\star^\top)U$ . By definition of  $\mathcal{M}$ , we have

$$\begin{aligned} (b^\top \mathcal{M}A + w_\star^\top)U &= \frac{1}{n} \sum_i b^\top \left[ \begin{smallmatrix} x^{(i)} \\ \langle x^{(i)}, w_\star \rangle \end{smallmatrix} \right]^{\otimes 2} AU + w_\star^\top U \\ &= \frac{1}{n} \sum_i b^\top \left[ \begin{smallmatrix} U\tilde{x}_i \\ \langle Ux^{(i)}, w_\star \rangle \end{smallmatrix} \right]^{\otimes 2} AU + w_\star^\top U \\ &= \frac{1}{n} \sum_i b^\top \begin{bmatrix} U & 0 \\ 0 & 1 \end{bmatrix} \left[ \begin{smallmatrix} \tilde{x}_i \\ \langle Ux^{(i)}, w_\star \rangle \end{smallmatrix} \right]^{\otimes 2} \begin{bmatrix} U^\top & 0 \\ 0 & 1 \end{bmatrix} AU + w_\star^\top U \\ &= \frac{1}{n} \sum_i \tilde{b}^\top \left[ \begin{smallmatrix} \tilde{x}_i \\ \langle x^{(i)}, \tilde{w}_\star \rangle \end{smallmatrix} \right]^{\otimes 2} \tilde{A} + \tilde{w}_\star^\top \end{aligned}$$

465 where we define  $\tilde{b}^\top := b^\top \begin{bmatrix} U & 0 \\ 0 & 1 \end{bmatrix}$ ,  $\tilde{A} := \begin{bmatrix} U^\top & 0 \\ 0 & 1 \end{bmatrix} AU$ , and  $\tilde{w}_\star := U^\top w_\star$ . By the rotational  
466 symmetry,  $\tilde{w}_\star$  is also distributed as  $\mathcal{N}(0, I_d)$ . Hence, this reduces to the previous case, and a global  
467 minimum is given as

$$\tilde{b} = \mathbf{e}_{d+1}, \quad \tilde{A} = -\begin{bmatrix} \text{diag} \left( \left\{ \frac{1}{\frac{n+1}{n}\lambda_j + \frac{1}{n} \cdot (\sum_k \lambda_k)} \right\}_j \right) \\ 0 \end{bmatrix}.$$

468 From the definition of  $\tilde{b}$ ,  $\tilde{A}$ , it thus follows that a global minimum is given by

$$b^\top = \mathbf{e}_{d+1}, \quad A = -\begin{bmatrix} U \text{diag} \left( \left\{ \frac{1}{\frac{n+1}{n}\lambda_i + \frac{1}{n} \cdot (\sum_k \lambda_k)} \right\}_i \right) U^\top \\ 0 \end{bmatrix},$$

469 as desired.

## 470 B Proofs for the multi-layer case

### 471 B.1 Proof of Theorem 3

472 The proof is based on probabilistic methods (Alon and Spencer, 2016). According to Lemma 9, the  
473 objective function can be written as (for more details check the derivations in (20))

$$\begin{aligned} f(A_1, A_2) &= \mathbf{E} \operatorname{Tr} \left( \mathbf{E} \left[ \prod_{i=1}^2 (I - X_0^\top A_i X_0 M) X_0^\top w_* w_*^\top X_0 \prod_{i=1}^2 (I - M X_0^\top A_i X_0) \right] \right) \\ &= \mathbf{E} \operatorname{Tr} \left( \mathbf{E} \left[ \prod_{i=2}^1 (I - X_0^\top A_i X_0 M) X_0^\top X_0 \prod_{j=1}^2 (I - M X_0^\top A_j X_0) \right] \right), \end{aligned}$$

474 where we use the isotropy of  $w_*$  and the linearity of trace to get the last equation. Suppose that  $A_0^*$   
475 and  $A_1^*$  denote the global minimizer of  $f$  over symmetric matrices. Since  $A_1^*$  is a symmetric matrix,  
476 it admits the spectral decomposition  $A_1^* = U D_1 U^\top$  where  $D_1$  is a diagonal matrix and  $U$  is an  
477 orthogonal matrix. Remarkably, the distribution of  $X_0$  is invariant to a linear transformation by an  
478 orthogonal matrix, i.e,  $X_0$  has the same distribution as  $X_0 U^\top$ . This invariance yields

$$f(U D_1 U^\top, A_2^*) = f(D_1, U^\top A_2^* U).$$

479 Thus, we can assume  $A_1^*$  is diagonal without loss of generality. To prove  $A_2^*$  is also diagonal, we  
480 leverage a probabilistic proof technique. Consider the random diagonal matrix  $S$  whose diagonal  
481 elements are either 1 or  $-1$  with probability  $\frac{1}{2}$ . Since the input distribution is invariant to orthogonal  
482 transformations, we have

$$f(D_1, A_2^*) = f(S D_1 S, S A_2^* S) = f(D_1, S A_2^* S).$$

483 Note that we use  $S D_1 S = D_1$  in the last equation, which holds due to  $D_1$  and  $S$  are diagonal matrices  
484 and  $S$  has diagonal elements in  $\{+1, -1\}$ . Since  $f$  is convex in  $A_2$ , a straightforward application of  
485 Jensen's inequality yields

$$f(D_1, A_2^*) = \mathbf{E} [f(D_1, S A_2^* S)] \geq f(D_1, \mathbf{E} [S A_2^* S]) = f(D_1, \mathbf{diag}(A_2^*)).$$

486 Thus, there are diagonal  $D_1$  and  $\mathbf{diag}(A_2^*)$  for which  $f(D_1, \mathbf{diag}(A_2^*)) \leq f(A_1^*, A_2^*)$  holds for an  
487 optimal  $A_1^*$  and  $A_2^*$ . This concludes the proof.

### 488 B.2 Proof of Theorem 4

489 Let us drop the factor of  $\frac{1}{n}$  which was present in the original update (51). This is because the  
490 constant  $1/n$  can be absorbed into  $A_i$ 's. Doing so does not change the theorem statement, but reduces  
491 notational clutter.

492 Let us consider the reformulation of the in-context loss  $f$  presented in Lemma 9. Specifically, let  $\bar{Z}_0$   
493 be defined as

$$\bar{Z}_0 = \begin{bmatrix} x^{(1)} & x^{(2)} & \dots & x^{(n)} & x^{(n+1)} \\ y^{(1)} & y^{(2)} & \dots & y^{(n)} & y^{(n+1)} \end{bmatrix} \in \mathbb{R}^{(d+1) \times (n+1)},$$

494 where  $y^{(n+1)} = \langle w_*, x^{(n+1)} \rangle$ . Let  $\bar{Z}_i$  denote the output of the  $(i-1)^{th}$  layer of the linear transformer  
495 (as defined in (51), initialized at  $\bar{Z}_0$ ). For the rest of this proof, we will drop the bar, and simply  
496 denote  $\bar{Z}_i$  by  $Z_i$ .<sup>2</sup> Let  $X_i \in \mathbb{R}^{d \times n+1}$  denote the first  $d$  rows of  $Z_i$  and let  $Y_i \in \mathbb{R}^{1 \times n+1}$  denote the  
497  $(d+1)^{th}$  row of  $Z_k$ . Under the sparsity pattern enforced in (9), we verify that, for any  $i \in \{0 \dots k\}$ ,

$$X_i = X_0,$$

$$Y_{i+1} = Y_i + Y_i M X_i^\top A_i X_i = Y_0 \prod_{\ell=0}^i (I + M X_0^\top A_\ell X_0). \quad (20)$$

<sup>2</sup>This use of  $Z_i$  differs the original definition in (1). But we will not refer to the original definition anywhere in this proof.

where  $M = \begin{bmatrix} I_{n \times n} & 0 \\ 0 & 0 \end{bmatrix}$ . We adopt the shorthand  $A = \{A_i\}_{i=0}^k$ .

We adopt the shorthand  $A = \{A_i\}_{i=0}^k$ . Let  $\mathcal{S} \subset \mathbb{R}^{(k+1) \times d \times d}$ , and  $A \in \mathcal{S}$  if and only if for all  $i \in \{0 \dots k\}$ , there exists scalars  $a_i \in \mathbb{R}$  such that  $A_i = a_i \Sigma^{-1}$  and  $B_i = b_i I$ . We use  $f(A)$  to refer to the in-context loss of Theorem 4, that is,

$$f(A) := f \left( \left\{ Q_i = \begin{bmatrix} A_i & 0 \\ 0 & 0 \end{bmatrix}, P_i = \begin{bmatrix} 0_{d \times d} & 0 \\ 0 & 1 \end{bmatrix} \right\}_{i=0}^k \right).$$

Throughout this proof, we will work with the following formulation of the *in-context loss* from Lemma 9:

$$f(A) = \mathbf{E}_{(X_0, w_*)} \left[ \text{Tr} \left( (I - M) Y_{k+1}^\top Y_{k+1} (I - M) \right) \right]. \quad (21)$$

The theorem statement is equivalent to the following:

$$\inf_{A \in \mathcal{S}} \sum_{i=0}^k \|\nabla_{A_i} f(A)\|_F^2 = 0, \quad (22)$$

where  $\nabla_{A_i} f$  denotes derivative wrt the Frobenius norm  $\|A_i\|_F$ . Towards this end, we establish the following intermediate result: if  $A \in \mathcal{S}$ , then for any  $R \in \mathbb{R}^{(k+1) \times d \times d}$ , there exists  $\tilde{R} \in \mathcal{S}$ , such that, at  $t = 0$ ,

$$\frac{d}{dt} f(A + t\tilde{R}) \leq \frac{d}{dt} f(A + tR). \quad (23)$$

In fact, we show that  $\tilde{R}_i := r_i I$ , for  $r_i = \frac{1}{d} \text{Tr}(\Sigma^{1/2} R_i \Sigma^{1/2})$ . This implies (22) via the following simple argument: Consider the " $\mathcal{S}$ -constrained gradient flow": let  $A(t) : \mathbb{R}^+ \rightarrow \mathbb{R}^{(k+1) \times d \times d}$  be defined as

$$\frac{d}{dt} A_i(t) = -r_i(t) \Sigma^{-1}, \quad r_i(t) := \text{Tr}(\Sigma^{1/2} \nabla_{A_i} f(A(t)) \Sigma^{1/2})$$

for  $i = 0 \dots k$ . By (23), we verify that

$$\frac{d}{dt} f(A(t)) \leq - \sum_{i=0}^k \|\nabla_{A_i} f(A(t))\|_F^2. \quad (24)$$

We verify from its definition that  $f(A) \geq 0$ ; if the infimum in (22) fails to be zero, then inequality (24) will ensure unbounded descent as  $t \rightarrow \infty$ , contradicting the fact that  $f(A)$  is lower-bounded. This concludes the proof.

### Step 0: Proof outline

The remainder of the proof will be devoted to showing (23), which we outline as follows:

- In Step 1, we reduce the condition in (24) to a more easily verified *layer-wise* condition. Specifically, we only need to verify (24) when  $R_i$  are all zero except for  $R_j$  for some fixed  $j$  (see (25))  
At the end of Step 1, we set up some additional notation, and introduce an important matrix  $G$ , which is roughly "a product of attention layer matrices". In (26), we study the evolution of  $f(A(t))$  when  $A(t)$  moves in the direction of  $R$ , as  $X_0$  is (roughly speaking) randomly transformed.
- In Step 2, we use the results of Step 2 to study  $G$  (see (27)) and  $\frac{d}{dt} G(A(t))$  (see (28)) under random transformation of  $X_0$ . The idea in (28) is that "randomly transforming  $X_0$ " has the same effect as "randomly transforming  $\mathcal{S}$ " (recall  $\mathcal{S}$  is the perturbation to  $\mathcal{B}$ ).
- In Step 3, we apply the result from Step 2 to the expression of  $\frac{d}{dt} f(A(t))$  in (26). We verify that  $\tilde{R}$  in (23) is exactly the expected matrix after "randomly transforming  $\mathcal{S}$ ". This concludes our proof.

### Step 1: Reduction to layer-wise condition

To prove (23), it suffices to show the following simpler condition: Let  $j \in \{0 \dots k\}$ . Let  $R_j \in \mathbb{R}^{d \times d}$  be arbitrary matrices. For  $C \in \mathbb{R}^{d \times d}$ , let  $A(tC, j)$  denote the collection of matrices, where

530  $[A(tC, j)]_j = A_j + tC$ , and for  $i \neq j$ ,  $A(tC, j)_i = A_i$ . We show that for all  $j \in \{0 \dots k\}$ ,  $R_j \in \mathbb{R}^{d \times d}$ ,  
 531 there exists  $\tilde{R}_j = r_j \Sigma^{-1}$ , such that, at  $t = 0$ ,

$$\frac{d}{dt} f(A(t\tilde{R}_j, j)) \leq \frac{d}{dt} f(A(tR_j, j)) \quad (25)$$

532 We can verify that (23) is equivalent to (25) by noticing that for any  $R$ , at  $t = 0$ ,  $\frac{d}{dt} f(A + tR) =$   
 533  $\sum_{j=0}^k \frac{d}{dt} f(A(tR_j, j))$ . We will now work towards proving (25) for some index  $j$  that is arbitrarily  
 534 chosen but fixed throughout.

535 By (20) and (21),

$$\begin{aligned} & f(A(tR_j, j)) \\ &= \mathbf{E} [\text{Tr}((I - M) Y_{k+1}^\top Y_{k+1} (I - M))] \\ &= \mathbf{E} [\text{Tr}((I - M) G(X_0, A_j + tR_j)^\top w_\star^\top w_\star G(X_0, A_j + tR_j) (I - M))] \\ &= \mathbf{E} [\text{Tr}((I - M) G(X_0, A_j + tR_j)^\top \Sigma^{-1} G(X_0, A_j + tR_j) (I - M))] \end{aligned}$$

536 where  $G(X, A_j + C) := X \prod_{i=0}^k (I - M X_0^\top [A(tC, j)]_i X)$ . The second equality follows from  
 537 plugging in (20). For the rest of this proof, let  $U$  denote a uniformly randomly sampled orthogonal  
 538 matrix. Let  $U_\Sigma := \Sigma^{1/2} U \Sigma^{-1/2}$ . Using the fact that  $X_0 \stackrel{d}{=} U_\Sigma X_0$ , we can verify

$$\begin{aligned} & \left. \frac{d}{dt} f(A(tR_j, j)) \right|_{t=0} \\ &= \left. \frac{d}{dt} \mathbf{E} [\text{Tr}((I - M) G(X_0, A_j + tR_j)^\top \Sigma^{-1} G(X_0, A_j + tR_j) (I - M))] \right|_{t=0} \\ &= \left. \frac{d}{dt} \mathbf{E}_{X_0, U} [\text{Tr}((I - M) G(U_\Sigma X_0, A_j + tR_j)^\top \Sigma^{-1} G(U_\Sigma X_0, A_j + tR_j) (I - M))] \right|_{t=0} \\ &= 2\mathbf{E}_{X_0, U} \left[ \text{Tr} \left( (I - M) G(U_\Sigma X_0, A_j)^\top \Sigma^{-1} \left. \frac{d}{dt} G(U_\Sigma X_0, A_j + tR_j) \right|_{t=0} (I - M) \right) \right]. \quad (26) \end{aligned}$$

539 **Step 2:  $G$  and  $\frac{d}{dt} G$  under random transformation of  $X_0$**

540 We will now verify that  $G(U_\Sigma X_0, A_j) = U_\Sigma G(X_0, A_j)$ :  
 541

$$\begin{aligned} & G(U_\Sigma X_0, A_j) \\ &= U_\Sigma X_0 \prod_{i=0}^k (I + M X_0^\top U_\Sigma^\top A_i U_\Sigma X_0) \\ &= U_\Sigma G(X_0, A_j), \end{aligned} \quad (27)$$

542 where we use the fact that  $U_\Sigma^\top A_i U_\Sigma = U_\Sigma^\top (a_i \Sigma^{-1}) U_\Sigma = A_i$ . Next, we verify that

$$\begin{aligned} \frac{d}{dt} G(U_\Sigma X_0, R_j) &= U_\Sigma X_0 \left( \prod_{i=0}^{j-1} (I + M X_0^\top A_i X_0) \right) M X_0^\top U_\Sigma^\top R_j U_\Sigma X_0 \prod_{i=j+1}^k (I + M X_0^\top A_i X_0) \\ &= U_\Sigma \frac{d}{dt} G(X_0, U_\Sigma^\top R_j U_\Sigma) \end{aligned} \quad (28)$$

543 where the first equality again uses the fact that  $U_\Sigma^\top A_i U_\Sigma = A_i$ .

544 **Step 3: Putting everything together**

545 Let us continue from (26). Plugging (27) and (28) into (26),  
 546

$$\begin{aligned} & \left. \frac{d}{dt} f(A(tR_j, j)) \right|_{t=0} \\ &= 2\mathbf{E}_{X_0, U} \left[ \text{Tr} \left( (I - M) G(U_\Sigma X_0, A_j)^\top \Sigma^{-1} \left. \frac{d}{dt} G(U_\Sigma X_0, A_j + tR_j) \right|_{t=0} (I - M) \right) \right] \end{aligned}$$

$$\begin{aligned}
&\stackrel{(i)}{=} 2\mathbf{E}_{X_0, U} \left[ \text{Tr} \left( (I - M) G(X_0, A_j)^\top \Sigma^{-1} \frac{d}{dt} G(X_0, A_j + tU_\Sigma^\top R_j U_\Sigma) \Big|_{t=0} (I - M) \right) \right] \\
&= 2\mathbf{E}_{X_0} \left[ \text{Tr} \left( (I - M) G(X_0, A_j)^\top \Sigma^{-1} \mathbf{E}_U \left[ \frac{d}{dt} G(X_0, A_j + tU_\Sigma^\top R_j U_\Sigma) \Big|_{t=0} \right] (I - M) \right) \right] \\
&\stackrel{(ii)}{=} 2\mathbf{E}_{X_0} \left[ \text{Tr} \left( (I - M) G(X_0, A_j)^\top \Sigma^{-1} \frac{d}{dt} G(X_0, A_j + t\mathbf{E}_U [U_\Sigma^\top R_j U_\Sigma]) \Big|_{t=0} (I - M) \right) \right] \\
&= 2\mathbf{E}_{X_0} \left[ \text{Tr} \left( (I - M) G(X_0, A_j)^\top \Sigma^{-1} \frac{d}{dt} G(X_0, A_j + t \cdot r_j \Sigma^{-1}) \Big|_{t=0} (I - M) \right) \right] \\
&= \frac{d}{dt} f(A(t \cdot r_j \Sigma^{-1}, j)) \Big|_{t=0},
\end{aligned}$$

547 where  $r_j := \frac{1}{d} \text{Tr}(\Sigma^{1/2} R_j \Sigma^{1/2})$ . In the above, (i) uses 1. (27) and (28), as well as the fact that  
548  $U_\Sigma^\top \Sigma^{-1} U_\Sigma = \Sigma^{-1}$ . (ii) uses the fact that  $\frac{d}{dt} G(X_0, A_j + tC) \Big|_{t=0}$  is affine in  $C$ . To see this, one  
549 can verify from the definition of  $G$ , e.g. using similar algebra as (28), that  $\frac{d}{dt} G(X_0, A_j + C)$  is affine  
550 in  $C$ . Thus  $\mathbf{E}_U [G(X_0, A_j + tU_\Sigma^\top R_j U_\Sigma)] = G(X_0, A_j + t\mathbf{E}_U [U_\Sigma^\top R_j U_\Sigma])$ .

### 551 B.3 Proof of Theorem 5

552 The proof of Theorem 5 is similar to that of Theorem 4, and with a similar setup. However to keep  
553 the proof self-contained, we will restate the setup. Once again, we drop the factor of  $\frac{1}{n}$  which was  
554 present in the original update (51). This is because the constant  $1/n$  can be absorbed into  $A_i$ 's. Doing  
555 so does not change the theorem statement, but reduces notational clutter.

556 Let us consider the reformulation of the in-context loss  $f$  presented in Lemma 9. Specifically, let  $\bar{Z}_0$   
557 be defined as

$$\bar{Z}_0 = \begin{bmatrix} x^{(1)} & x^{(2)} & \dots & x^{(n)} & x^{(n+1)} \\ y^{(1)} & y^{(2)} & \dots & y^{(n)} & y^{(n+1)} \end{bmatrix} \in \mathbb{R}^{(d+1) \times (n+1)},$$

558 where  $y^{(n+1)} = \langle w_*, x^{(n+1)} \rangle$ . Let  $\bar{Z}_i$  denote the output of the  $(i-1)^{th}$  layer of the linear transformer  
559 (as defined in (51), initialized at  $\bar{Z}_0$ ). For the rest of this proof, we will drop the bar, and simply  
560 denote  $\bar{Z}_i$  by  $Z_i$ .<sup>3</sup> Let  $X_i \in \mathbb{R}^{d \times n+1}$  denote the first  $d$  rows of  $Z_i$  and let  $Y_i \in \mathbb{R}^{1 \times n+1}$  denote the  
561  $(d+1)^{th}$  row of  $Z_i$ . Under the sparsity pattern enforced in (11), we verify that, for any  $i \in \{0 \dots k\}$ ,

$$\begin{aligned}
X_{i+1} &= X_i + B_i X_i M X_i^\top A_i X_i \\
Y_{i+1} &= Y_i + Y_i M X_i^\top A_i X_i = Y_0 \prod_{\ell=0}^i (I + M X_\ell^\top A_\ell X_\ell).
\end{aligned} \tag{29}$$

562 We adopt the shorthand  $A = \{A_i\}_{i=0}^k$  and  $B = \{B_i\}_{i=0}^k$ . Let  $\mathcal{S} \subset \mathbb{R}^{2 \times (k+1) \times d \times d}$ , and  $(A, B) \in \mathcal{S}$   
563 if and only if for all  $i \in \{0 \dots k\}$ , there exists scalars  $a_i, b_i \in \mathbb{R}$  such that  $A_i = a_i \Sigma^{-1}$  and  $B_i = b_i I$ .  
564 Throughout this proof, we will work with the following formulation of the *in-context loss* from  
565 Lemma 9:

$$f(A, B) := \mathbf{E}_{(X_0, w_*)} [\text{Tr}((I - M) Y_{k+1}^\top Y_{k+1} (I - M))]. \tag{30}$$

566 (note that the only randomness in  $Z_0$  comes from  $X_0$  as  $Y_0$  is a deterministic function of  $X_0$ ). The  
567 theorem statement is equivalent to the following:

$$\inf_{(A, B) \in \mathcal{S}} \sum_{i=0}^k \|\nabla_{A_i} f(A, B)\|_F^2 + \|\nabla_{B_i} f(A, B)\|_F^2 = 0 \tag{31}$$

568 where  $\nabla_{A_i} f$  denotes derivative wrt the Frobenius norm  $\|A_i\|_F$ .

<sup>3</sup>This use of  $Z_i$  differs the original definition in (1). But we will not refer to the original definition anywhere in this proof.

Our goal is to show that, if  $(A, B) \in \mathcal{S}$ , then for any  $(R, S) \in \mathbb{R}^{2 \times (k+1) \times d \times d}$ , there exists  $(\tilde{R}, \tilde{S}) \in \mathcal{S}$ , such that, at  $t = 0$ ,

$$\frac{d}{dt} f(A + t\tilde{R}, B + t\tilde{S}) \leq \frac{d}{dt} f(A + tR, B + tS). \quad (32)$$

In fact, we show that  $\tilde{R}_i := r_i I$ , for  $r_i = \frac{1}{d} \text{Tr}(\Sigma^{1/2} R_i \Sigma^{1/2})$  and  $\tilde{S}_i = s_i I$ , for  $s_i = \frac{1}{d} \text{Tr}(\Sigma^{-1/2} S_i \Sigma^{1/2})$ . This implies (31) via the following simple argument: Consider the "S-constrained gradient flow": let  $A(t) : \mathbb{R}^+ \rightarrow \mathbb{R}^{(k+1) \times d \times d}$  and  $B(t) : \mathbb{R}^+ \rightarrow \mathbb{R}^{(k+1) \times d \times d}$  be defined as

$$\begin{aligned} \frac{d}{dt} A_i(t) &= -r_i(t) \Sigma^{-1}, & r_i(t) &:= \text{Tr}(\Sigma^{1/2} \nabla_{A_i} f(A(t), B(t)) \Sigma^{1/2}) \\ \frac{d}{dt} B_i(t) &= -s_i(t) \Sigma^{-1}, & s_i(t) &:= \text{Tr}(\Sigma^{-1/2} \nabla_{B_i} f(A(t), B(t)) \Sigma^{1/2}), \end{aligned}$$

for  $i = 0 \dots k$ . By (32), we verify that

$$\frac{d}{dt} f(A(t), B(t)) \leq - \left( \sum_{i=0}^k \|\nabla_{A_i} f(A(t), B(t))\|_F^2 + \|\nabla_{B_i} f(A(t), B(t))\|_F^2 \right). \quad (33)$$

We verify from its definition that  $f(A, B) \geq 0$ ; if (31) does not hold then (33) will ensure unbounded descent as  $t \rightarrow \infty$ , contradicting the fact that  $f(A, B)$  is lower-bounded. This concludes the proof.

## Step 0: Proof outline

The remainder of the proof will be devoted to showing (32), which we outline as follows:

- In Step 1, we reduce the condition in (32) to a more easily verified *layer-wise* condition. Specifically, we only need to verify (32) in one of the two cases: (I) when  $R_i, S_i$  are all zero except for  $R_j$  for some fixed  $j$  (see (35)), or (II) when  $R_i, S_i$  are all zero except for  $S_j$  for some fixed  $j$  (see (34)). We focus on the proof of (II), as the proof of (I) is almost identical. At the end of Step 1, we set up some additional notation, and introduce an important matrix  $G$ , which is roughly "a product of attention layer matrices". In (36), we study the evolution of  $f(A, B(t))$  when  $B(t)$  moves in the direction of  $S$ , as  $X_0$  is (roughly speaking) randomly transformed. This motivates the subsequent analysis in Steps 2 and 3 below.
- In Step 2, we study how outputs of each layer (29) changes when  $X_0$  is randomly transformed. There are two main results here: First we provide the expression for  $X_i$  in (37). Second, we provide the expression for  $\frac{d}{dt} X_i(B(t))$  in (38).
- In Step 3, we use the results of Step 2 to study  $G$  (see (42)) and  $\frac{d}{dt} G(B(t))$  (see (43)) under random transformation of  $X_0$ . The idea in (43) is that "randomly transforming  $X_0$ " has the same effect as "randomly transforming  $S$ " (recall  $S$  is the perturbation to  $B$ ).
- In Step 4, we use the results from Steps 2 and 3 to the expression of  $\frac{d}{dt} f(A, B(t))$  in (36). We verify that  $\tilde{S}$  in (32) is exactly the expected matrix after "randomly transforming  $S$ ". This concludes our proof of (II).
- In Step 5, we sketch the proof of (I), which is almost identical to Steps 2-4.

## Step 1: Reduction to layer-wise condition

To prove (32), it suffices to show the following simpler condition: Let  $j \in \{0 \dots k\}$ . Let  $R_j, S_j \in \mathbb{R}^{d \times d}$  be arbitrary matrices. For  $C \in \mathbb{R}^{d \times d}$ , let  $A(tC, j)$  denote the collection of matrices, where  $A(tC, j)_j = A_j + tC$ , and for  $i \neq j$ ,  $A(tC, j)_i = A_i$ . Define  $B(tC, j)$  analogously. We show that for all  $j \in \{0 \dots k\}$  and all  $R_j, S_j \in \mathbb{R}^{d \times d}$ , there exists  $\tilde{R}_j = r_j \Sigma^{-1}$  and  $\tilde{S}_j = s_j \Sigma^{-1}$ , such that, at  $t = 0$ ,

$$\frac{d}{dt} f(A(t\tilde{R}_j, j), B) \leq \frac{d}{dt} f(A(tR_j, j), B) \quad (34)$$

$$\text{and} \quad \frac{d}{dt} f(A, B(t\tilde{S}_j, j)) \leq \frac{d}{dt} f(A, B(tS_j, j)). \quad (35)$$

605 We can verify that (32) is equivalent to (34)+(35) by noticing that for any  $(R, S) \in \mathbb{R}^{2 \times (k+1) \times d \times d}$ ,  
 606 at  $t = 0$ ,  $\frac{d}{dt} f(A + tR, B + tS) = \sum_{j=0}^k \left( \frac{d}{dt} f(A(tR_j, j), B) + \frac{d}{dt} f(A, B(tS_j, j)) \right)$ .

607 We will first focus on proving (35) (the proof of (34) is similar, and we present it in Step 5 at the  
 608 end), for some index  $j$  that is arbitrarily chosen but fixed throughout. Notice that  $X_i$  and  $Y_i$  in (29)  
 609 are in fact functions of  $A, B$  and  $X_0$ . For most of our subsequent discussion,  $A_i$  (for all  $i$ ) and  $B_i$   
 610 (for all  $i \neq j$ ) can be treated as constant matrices. We will however make the dependence on  $X_0$  and  
 611  $B_j$  explicit (as we consider the curve  $B_j + tS$ ), i.e. we use  $X_i(X, C)$  (resp  $Y_i(X, C)$ ) to denote the  
 612 value of  $X_i$  (resp  $Y_i$ ) from (29), with  $X_0 = X$ , and  $B_j = C$ .

613 By (30) and (29),

$$\begin{aligned} & f(A, B(tS_j, j)) \\ &= \mathbf{E} \left[ \text{Tr} \left( (I - M) Y_{k+1}(X_0, B_j + tS)^\top Y_{k+1}(X_0, B_j + tS_j) (I - M) \right) \right] \\ &= \mathbf{E} \left[ \text{Tr} \left( (I - M) G(X_0, B_j + tS_j)^\top w_\star^\top w_\star G(X_0, B_j + tS_j) (I - M) \right) \right] \\ &= \mathbf{E} \left[ \text{Tr} \left( (I - M) G(X_0, B_j + tS_j)^\top \Sigma^{-1} G(X_0, B_j + tS_j) (I - M) \right) \right] \end{aligned}$$

614 where  $G(X, C) := X \prod_{i=0}^k (I - M X_i(X, C)^T A_i X_i(X, C))$ . The second equality follows from  
 615 plugging in (29).

616 For the rest of this proof, let  $U$  denote a uniformly randomly sampled orthogonal matrix. Let  
 617  $U_\Sigma := \Sigma^{1/2} U \Sigma^{-1/2}$ . Using the fact that  $X_0 \stackrel{d}{=} U_\Sigma X_0$ , we can verify

$$\begin{aligned} & \left. \frac{d}{dt} f(A, B(tS_j, j)) \right|_{t=0} \\ &= \left. \frac{d}{dt} \mathbf{E}_{X_0} \left[ \text{Tr} \left( (I - M) G(X_0, B_j + tS_j)^\top \Sigma^{-1} G(X_0, B_j + tS_j) (I - M) \right) \right] \right|_{t=0} \\ &= \left. \frac{d}{dt} \mathbf{E}_{X_0, U} \left[ \text{Tr} \left( (I - M) G(U_\Sigma X_0, B_j + tS_j)^\top \Sigma^{-1} G(U_\Sigma X_0, B_j + tS_j) (I - M) \right) \right] \right|_{t=0} \\ &= 2 \mathbf{E}_{X_0, U} \left[ \text{Tr} \left( (I - M) G(U_\Sigma X_0, B_j)^\top \Sigma^{-1} \left. \frac{d}{dt} G(U_\Sigma X_0, B_j + tS_j) \right|_{t=0} (I - M) \right) \right]. \quad (36) \end{aligned}$$

618 **Step 2:  $X_i$  and  $\frac{d}{dt} X_i$  under random transformation of  $X_0$**

619 In this step, we prove that when  $X_0$  is transformed by  $U_\Sigma$ ,  $X_i$  for  $i \geq 1$  are likewise transformed in a  
 620 simple manner. The first goal of this step is to show

$$X_i(U_\Sigma X_0, B_j) = U_\Sigma X_i(X_0, B_j). \quad (37)$$

621 We will prove this by induction. When  $i = 0$ , this clearly holds by definition. Suppose that (37) holds  
 622 for some  $i$ . Then

$$\begin{aligned} & X_{i+1}(U_\Sigma X_0, B_j) \\ &= X_i(U_\Sigma X_0, B_j) + B_i X_i(U_\Sigma X_0, B_j) M X_i(U_\Sigma X_0, B_j)^T A_i X_i(U_\Sigma X_0, B_j) \\ &= U_\Sigma X_i(X_0, B_j) + U_\Sigma B_i X_i(X_0, B_j) M X_i(X_0, B_j)^T A_i X_i(X_0, B_j) \\ &= U_\Sigma X_{i+1}(X_0, B_j) \end{aligned}$$

623 where the second equality uses the inductive hypothesis, and the fact that  $A_i = a_i \Sigma^{-1}$ , so that  
 624  $U_\Sigma^T A_i U_\Sigma = A_i$ , and the fact that  $B_i = b_i I$ , from the definition of  $\mathcal{S}$  and our assumption that  
 625  $(A, B) \in \mathcal{S}$ . This concludes the proof of (37).

626 We now present the second main result of this step. Let  $U_\Sigma^{-1} := \Sigma^{1/2} U^T \Sigma^{-1/2}$ , so that it satisfies  
 627  $U_\Sigma U_\Sigma^{-1} = U_\Sigma^{-1} U_\Sigma = I$ . For all  $i$ ,

$$U_\Sigma^{-1} \left. \frac{d}{dt} X_i(U_\Sigma X_0, B_j + tS_j) \right|_{t=0} = \left. \frac{d}{dt} X_i(X_0, B_j + tU_\Sigma^{-1} S_j U_\Sigma) \right|_{t=0}. \quad (38)$$

628 To reduce notation, we will not write  $\cdot|_{t=0}$  explicitly in the subsequent proof. We first write down the  
 629 dynamics for the right-hand-side term of (38): From (29), for any  $\ell \leq j$ , and for any  $i \geq j + 1$ , and

630 for any  $C \in \mathbb{R}^{d \times d}$ ,

$$\begin{aligned}
\frac{d}{dt} X_\ell (X_0, B_j + tC) &= 0 \\
\frac{d}{dt} X_{j+1} (X_0, B_j + tC) &= CX_j (X_0, B_j) M X_j (X_0, B_j)^\top A_j X_j (X_0, B_j) \\
\frac{d}{dt} X_{i+1} (X_0, B_j + tC) &= \frac{d}{dt} X_i (X_0, B_j + tC) \\
&\quad + B_i \left( \frac{d}{dt} X_i (X_0, B_j + tC) \right) M X_i (X_0, B_j)^\top A_i X_i (X_0, B_j) \\
&\quad + B_i X_i (X_0, B_j) M \left( \frac{d}{dt} X_i (X_0, B_j + tC) \right)^\top A_i X_i (X_0, B_j) \\
&\quad + B_i X_i (X_0, B_j) M X_i (X_0, B_j)^\top A_i \left( \frac{d}{dt} X_i (X_0, B_j + tC) \right) \quad (39)
\end{aligned}$$

631 We are now ready to prove (38) using induction. For the base case, we verify that for  $\ell \leq j$ ,  
632  $U_\Sigma^{-1} \frac{d}{dt} X_\ell (U_\Sigma X_0, B_j + tS_j) = 0 = \frac{d}{dt} X_\ell (X_0, B_j + tU_\Sigma^{-1} S_j U_\Sigma)$  (see first equation in (39)). For  
633 index  $j+1$ , we verify that

$$\begin{aligned}
U_\Sigma^{-1} \frac{d}{dt} X_{j+1} (U_\Sigma X_0, B_j + tS_j) &= U_\Sigma^{-1} S_j U_\Sigma X_j (X_0, B_j) M X_j (U_\Sigma X_0, B_j)^\top A_j \\
&= \frac{d}{dt} X_{j+1} (U_\Sigma X_0, B_j + tU_\Sigma^{-1} S_j U_\Sigma X_j) \quad (40)
\end{aligned}$$

634 where we use two facts: 1.  $X_i(U_\Sigma X_0, B_j) = U_\Sigma X_i(X_0, B_j)$  from (37), 2.  $A_i = a_i \Sigma^{-1}$ ,  
635 so that  $U_\Sigma^\top A_i U_\Sigma = A_i$ . We verify by comparison to the second equation in (39) that  
636  $U_\Sigma^{-1} \frac{d}{dt} X_j (U_\Sigma X_0, B_j + tS_j) = 0 = \frac{d}{dt} X_j (X_0, B_j + tU_\Sigma^{-1} S_j U_\Sigma)$ . These conclude the proof  
637 of the base case.

638 Now suppose that (38) holds for some  $i$ . We will now prove (38) holds for  $i+1$ . From (29),

$$\begin{aligned}
&U_\Sigma^{-1} \frac{d}{dt} X_{i+1} (U_\Sigma X_0, B_j + tS_j) \\
&= U_\Sigma^{-1} \frac{d}{dt} (X_i (U_\Sigma X_0, B_j + tS_j)) \\
&\quad + U_\Sigma^{-1} \frac{d}{dt} \left( B_i X_i (U_\Sigma X_0, B_j + tS_j) M X_i (U_\Sigma X_0, B_j + tS_j)^\top A_i X_i (U_\Sigma X_0, B_j + tS_j) \right) \\
&= U_\Sigma^{-1} \frac{d}{dt} (X_i (U_\Sigma X_0, B_j + tS_j)) \\
&\quad + U_\Sigma^{-1} B_i \left( \frac{d}{dt} X_i (U_\Sigma X_0, B_j + tS_j) \right) M X_i (U_\Sigma X_0, B_j)^\top A_i X_i (U_\Sigma X_0, B_j) \\
&\quad + U_\Sigma^{-1} B_i X_i (U_\Sigma X_0, B_j) M \left( \frac{d}{dt} X_i (U_\Sigma X_0, B_j + tS_j) \right)^\top A_i X_i (U_\Sigma X_0, B_j) \\
&\quad + U_\Sigma^{-1} B_i X_i (U_\Sigma X_0, B_j) M X_i (U_\Sigma X_0, B_j)^\top A_i \left( \frac{d}{dt} X_i (U_\Sigma X_0, B_j + tS_j) \right) \\
&\stackrel{(i)}{=} U_\Sigma^{-1} \frac{d}{dt} X_i (U_\Sigma X_0, B_j + tS_j) \\
&\quad + B_i \left( U_\Sigma^{-1} \frac{d}{dt} X_i (U_\Sigma X_0, B_j + tS_j) \right) M X_i (X_0, B_j)^\top A_i X_i (X_0, B_j) \\
&\quad + B_i X_i (X_0, B_j) M \left( U_\Sigma^{-1} \frac{d}{dt} X_i (U_\Sigma X_0, B_j + tS_j) \right)^\top A_i X_i (X_0, B_j) \\
&\quad - B_i X_i (X_0, B_j) M X_i (X_0, B_j)^\top A_i \left( U_\Sigma^{-1} \frac{d}{dt} X_i (U_\Sigma X_0, B_j + tS_j) \right) \\
&\stackrel{(ii)}{=} \frac{d}{dt} X_i (X_0, B_j + tU_\Sigma^{-1} S_j U_\Sigma)
\end{aligned}$$

$$\begin{aligned}
& + B_i \left( \frac{d}{dt} X_i (X_0, B_j + tU_\Sigma^{-1} S_j U_\Sigma) \right) M X_i (X_0, B_j)^\top A_i X_i (X_0, B_j) \\
& + B_i X_i (X_0, B_j) M \left( \frac{d}{dt} X_i (X_0, B_j + tU_\Sigma^{-1} S_j U_\Sigma) \right)^\top A_i X_i (X_0, B_j) \\
& + B_i X_i (X_0, B_j) M X_i (X_0, B_j)^\top A_i \left( \frac{d}{dt} X_i (X_0, B_j + tU_\Sigma^{-1} S_j U_\Sigma) \right)
\end{aligned} \tag{41}$$

639 In (i) above, we crucially use the following facts: 1.  $B_i = b_i I$  so that  $U_\Sigma^{-1} B_i = B_i U_\Sigma^{-1}$ , 2.  
640  $X_i(U_\Sigma X_0, B_j) = U_\Sigma X_i(X_0, B_j)$  from (37), 3.  $A_i = a_i \Sigma^{-1}$ , so that  $U_\Sigma^\top A_i U_\Sigma = A_i$ , 4.  $U_\Sigma U_\Sigma^{-1} =$   
641  $U_\Sigma^{-1} U_\Sigma = I$ . (ii) follows from our inductive hypothesis. The inductive proof is complete by  
642 verifying that (41) exactly matches the third equation of (39) when  $C = U_\Sigma^{-1} S U_\Sigma$ .

643 **Step 3:  $G$  and  $\frac{d}{dt} G$  under random transformation of  $X_0$**

644 We now verify that  $G(U_\Sigma X_0, B_j) = U_\Sigma G(X_0, B_j)$ . This is a straightforward consequence of (37)  
645 as

$$\begin{aligned}
& G(U_\Sigma X_0, B_j) \\
& = U_\Sigma X_0 \prod_{i=0}^k (I + M X_i(U_\Sigma X_0, B_j)^\top A_i X_i(U_\Sigma X_0, B_j)) \\
& = U_\Sigma X_0 \prod_{i=0}^k (I + M X_i(X_0, B_j)^\top A_i X_i(X_0, B_j)) \\
& = U_\Sigma G(X_0, B_j),
\end{aligned} \tag{42}$$

646 where the second equality uses (37), as well as the fact that  $U_\Sigma^\top A_i U_\Sigma = A_i$ . Next, we will show that

$$U_\Sigma^{-1} \frac{d}{dt} G(U_\Sigma X_0, B_j + tS_j) \Big|_{t=0} = \frac{d}{dt} G(X_0, B_j + tU_\Sigma^{-1} S_j U_\Sigma) \Big|_{t=0}. \tag{43}$$

647 To see this, we can expand

$$\begin{aligned}
& U_\Sigma^{-1} \frac{d}{dt} G(U_\Sigma X_0, B_j + tS_j) \\
& = U_\Sigma^{-1} \frac{d}{dt} \left( U_\Sigma X_0 \prod_{i=0}^k (I + M X_i(U_\Sigma X_0, B_j + tS_j)^\top A_i X_i(U_\Sigma X_0, B_j + tS_j)) \right) \\
& = X_0 \sum_{i=0}^k \left( \prod_{\ell=0}^{i-1} (I + M X_\ell(U_\Sigma X_0, B_j)^\top A_\ell X_\ell(U_\Sigma X_0, B_\ell)) \right) \\
& \quad \cdot M \frac{d}{dt} (X_i(U_\Sigma X_0, B_j + tS_j)^\top A_i X_i(U_\Sigma X_0, B_j)) \\
& \quad \cdot \left( \prod_{\ell=i+1}^k (I + M X_\ell(U_\Sigma X_0, B_j)^\top A_\ell X_\ell(U_\Sigma X_0, B_\ell)) \right) \\
& \stackrel{(i)}{=} X_0 \sum_{i=0}^k \left( \prod_{\ell=0}^{i-1} (I + M X_\ell(X_0, B_j)^\top A_\ell X_\ell(X_0, B_\ell)) \right) \\
& \quad \cdot M \left( \left( U_\Sigma^{-1} \frac{d}{dt} X_i(U_\Sigma X_0, B_j + tS_j) \right)^\top A_i X_i(X_0, B_j) + M X_i(X_0, B_j)^\top A_i \left( U_\Sigma^{-1} \frac{d}{dt} X_i(U_\Sigma X_0, B_j + tS_j) \right) \right) \\
& \quad \cdot \left( \prod_{\ell=i+1}^k (I + M X_\ell(X_0, B_j)^\top A_\ell X_\ell(X_0, B_\ell)) \right) \\
& \stackrel{(ii)}{=} X_0 \sum_{i=0}^k \left( \prod_{\ell=0}^{i-1} (I + M X_\ell(X_0, B_j)^\top A_\ell X_\ell(X_0, B_\ell)) \right)
\end{aligned}$$

$$\begin{aligned}
& \cdot M \left( \left( \frac{d}{dt} X_i(X_0, B_j + tU_\Sigma^{-1} S_j U_\Sigma) \right)^T A_i X_i(X_0, B_j) + M X_i(X_0, B_j)^T A_i \left( \frac{d}{dt} X_i(X_0, B_j + tU_\Sigma^{-1} S_j U_\Sigma) \right) \right) \\
& \cdot \left( \prod_{\ell=i+1}^k (I + M X_\ell(X_0, B_j)^T A_\ell X_\ell(X_0, B_\ell)) \right) \\
& \stackrel{(iii)}{=} \frac{d}{dt} G(X_0, B_j + tU_\Sigma^{-1} S_j U_\Sigma)
\end{aligned}$$

648 In (i) above, we use the following facts: 1.  $X_i(U_\Sigma X_0, B_j) = U_\Sigma X_i(X_0, B_j)$  from (37), 2.  $A_i = a_i \Sigma^{-1}$ ,  
649 so that  $U_\Sigma^\top A_i U_\Sigma = A_i$ , 3.  $U_\Sigma U_\Sigma^{-1} = U_\Sigma^{-1} U_\Sigma = I$ . (ii) follows from (38). (iii) is by definition of  
650  $G$ .

#### 651 Step 4: Putting everything together

652 Let us now continue from (36). We can now plug (42) and (43) into (36):

$$\begin{aligned}
& \left. \frac{d}{dt} f(A, B(tS_j, j)) \right|_{t=0} \\
& = 2\mathbf{E}_{X_0, U} \left[ \text{Tr} \left( (I - M) G(U_\Sigma X_0, B_j)^\top \Sigma^{-1} \left. \frac{d}{dt} G(U_\Sigma X_0, B_j + tS_j) \right|_{t=0} (I - M) \right) \right] \\
& \stackrel{(i)}{=} 2\mathbf{E}_{X_0, U} \left[ \text{Tr} \left( (I - M) G(X_0, B_j)^\top \Sigma^{-1} \left. \frac{d}{dt} G(X_0, B_j + tU_\Sigma^{-1} S_j U_\Sigma) \right|_{t=0} (I - M) \right) \right] \\
& = 2\mathbf{E}_{X_0} \left[ \text{Tr} \left( (I - M) G(X_0, B_j)^\top \Sigma^{-1} \mathbf{E}_U \left[ \left. \frac{d}{dt} G(X_0, B_j + tU_\Sigma^{-1} S_j U_\Sigma) \right|_{t=0} \right] (I - M) \right) \right] \\
& \stackrel{(ii)}{=} 2\mathbf{E}_{X_0} \left[ \text{Tr} \left( (I - M) G(X_0, B_j)^\top \Sigma^{-1} \left. \frac{d}{dt} G(X_0, B_j + t\mathbf{E}_U [U_\Sigma^{-1} S_j U_\Sigma]) \right|_{t=0} (I - M) \right) \right] \\
& = 2\mathbf{E}_{X_0} \left[ \text{Tr} \left( (I - M) G(X_0, B_j)^\top \Sigma^{-1} \left. \frac{d}{dt} G(X_0, B_j + ts_j I) \right|_{t=0} (I - M) \right) \right] \\
& = \left. \frac{d}{dt} f(A, B(ts_j I, j)) \right|_{t=0}
\end{aligned}$$

653 where  $s_j := \frac{1}{d} \text{Tr}(\Sigma^{-1/2} S_j \Sigma^{1/2})$ . In the above, (i) uses 1. (42) and (43), as well as the fact that  
654  $U_\Sigma^\top \Sigma^{-1} U_\Sigma = \Sigma^{-1}$ . (ii) uses the fact that  $\left. \frac{d}{dt} G(X_0, B_j + tC) \right|_{t=0}$  is affine in  $C$ . To see this, one  
655 can verify from (39), using a simple induction argument, that  $\left. \frac{d}{dt} X_i(X_0, B_j + tC) \right|_{t=0}$  is affine in  $C$  for  
656 all  $i$ . We can then verify from the definition of  $G$ , e.g. using similar algebra as the proof of (43),  
657 that  $\left. \frac{d}{dt} G(X_0, B_j + tC) \right|_{t=0}$  is affine in  $\left. \frac{d}{dt} X_i(X_0, B_j + tC) \right|_{t=0}$ . Thus  $\mathbf{E}_U [G(X_0, B_j + tU_\Sigma^{-1} S_j U_\Sigma)] =$   
658  $G(X_0, B_j + t\mathbf{E}_U [U_\Sigma^{-1} S_j U_\Sigma])$ .

659 With this, we conclude our proof of (35).

#### 660 Step 5: Proof of (34)

661 We will now prove (34) for fixed but arbitrary  $j$ , i.e. there is some  $r_j$  such that

$$\left. \frac{d}{dt} f(A(t \cdot r_j \Sigma^{-1}, j), B) \right|_{t=0} \leq \left. \frac{d}{dt} f(A(tR_j, j), B) \right|_{t=0}.$$

662 The proof is very similar to the proof of (35) that we just saw, and we will essentially repeat the same  
663 steps from Step 2-4 above.

664 Let us introduce a redefinition: let  $X_i(X, C)$  (resp  $Y_i(X, C)$ ) to denote the value of  $X_i$  (resp  
665  $Y_i$ ) from (29), with  $X_0 = X$ , and  $A_j = C$  (previously it was with  $B_j = C$ ). Once again, let  
666  $G(X, C) := X \prod_{i=0}^i (I + M X_i(X, C)^T \bar{A}_i X_i(X, C))$ , where  $\bar{A}_j = A_j + tC$ , and  $\bar{A}_\ell = A_\ell$  for all  
667  $\ell \in \{0 \dots k\} \setminus \{j\}$ .

668 We first verify that

$$\begin{aligned}
X_i(U_\Sigma X_0, B_j) &= U_\Sigma X_i(X_0, B_j) \\
G(U_\Sigma X_0, B_j) &= U_\Sigma G(X_0, B_j).
\end{aligned} \tag{44}$$

669 The proofs are identical to the proofs of (37) and (42) so we omit them. Next, we show that for all  $i$ ,

$$U_{\Sigma}^{-1} \frac{d}{dt} X_i(U_{\Sigma} X_0, A_j + tR_j) \Big|_{t=0} = \frac{d}{dt} X_i(X_0, A_j + tU_{\Sigma}^{\top} R_j U_{\Sigma}) \Big|_{t=0}. \quad (45)$$

670 We establish the dynamics for the right-hand-side of (45):

$$\begin{aligned} \frac{d}{dt} X_{\ell}(X_0, A_j + tC) &= 0 \\ \frac{d}{dt} X_{j+1}(X_0, A_j + tC) &= B_j X_j(X_0, A_j) M X_j(X_0, A_j)^{\top} C X_j(X_0, A_j) \\ \frac{d}{dt} X_{i+1}(X_0, A_j + tC) &= \frac{d}{dt} X_i(X_0, A_j + tC) \\ &\quad + B_i \left( \frac{d}{dt} X_i(X_0, A_j + tC) \right) M X_i(X_0, A_j)^{\top} A_i X_i(X_0, A_j) \\ &\quad + B_i X_i(X_0, A_j) M \left( \frac{d}{dt} X_i(X_0, A_j + tC) \right)^{\top} A_i X_i(X_0, A_j) \\ &\quad + B_i X_i(X_0, A_j) M X_i(X_0, A_j)^{\top} A_i \left( \frac{d}{dt} X_i(X_0, A_j + tC) \right) \end{aligned} \quad (46)$$

671 Similar to (40), we show that for  $i \leq j$ ,

$$\begin{aligned} U_{\Sigma}^{-1} \frac{d}{dt} X_i(U_{\Sigma} X_0, A_j + tR_j) &= 0 = U_{\Sigma}^{-1} \frac{d}{dt} X_i(U_{\Sigma} X_0, A_j + tU_{\Sigma} R_j U_{\Sigma}) \\ U_{\Sigma}^{-1} \frac{d}{dt} X_{j+1}(U_{\Sigma} X_0, A_j + tR_j) &= U_{\Sigma}^{-1} B_j U_{\Sigma} X_j(X_0, A_j) M X_j(U_{\Sigma} X_0, A_j)^{\top} A_j \\ &= \frac{d}{dt} X_{j+1}(U_{\Sigma} X_0, A_j + tU_{\Sigma}^{\top} R_j U_{\Sigma} X_j). \end{aligned}$$

672 Finally, for the inductive step, we follow identical steps leading up to (41) to show that

$$\begin{aligned} &U_{\Sigma}^{-1} \frac{d}{dt} X_{i+1}(U_{\Sigma} X_0, A_j + tR_j) \\ &= \frac{d}{dt} X_i(X_0, A_j + tU_{\Sigma}^{\top} R_j U_{\Sigma}) \\ &\quad + B_i \left( \frac{d}{dt} X_i(X_0, A_j + tU_{\Sigma}^{\top} R_j U_{\Sigma}) \right) M X_i(X_0, A_j)^{\top} A_i X_i(X_0, A_j) \\ &\quad + B_i X_i(X_0, A_j) M \left( \frac{d}{dt} X_i(X_0, A_j + tU_{\Sigma}^{\top} R_j U_{\Sigma}) \right)^{\top} A_i X_i(X_0, A_j) \\ &\quad + B_i X_i(X_0, A_j) M X_i(X_0, A_j)^{\top} A_i \left( \frac{d}{dt} X_i(X_0, A_j + tU_{\Sigma}^{\top} R_j U_{\Sigma}) \right) \end{aligned} \quad (47)$$

673 The inductive proof is complete by verifying that (47) exactly matches the third equation of (46)  
674 when  $C = U_{\Sigma}^{-1} S U_{\Sigma}$ . This concludes the proof of (45).

675 Next, we study the time derivative of  $G(U_{\Sigma} X_0, A_j + tR_j)$  and show that

$$U_{\Sigma}^{-1} \frac{d}{dt} G(U_{\Sigma} X_0, A_j + tR_j) = \frac{d}{dt} G(X_0, A_j + tU_{\Sigma}^{\top} R_j U_{\Sigma}). \quad (48)$$

676 This proof differs significantly from that of (43) in a few places, so we provide the whole derivation  
677 below. By chain-rule, we can write

$$U_{\Sigma}^{-1} \frac{d}{dt} G(U_{\Sigma} X_0, A_j + tR_j) = \spadesuit + \heartsuit$$

678 where

$$\spadesuit := U_{\Sigma}^{-1} \frac{d}{dt} \left( U_{\Sigma} X_0 \prod_{i=0}^k (I + M X_i(U_{\Sigma} X_0, A_j + tR_j)^{\top} A_i X_i(U_{\Sigma} X_0, A_j + tR_j)) \right)$$

679 and

$$\begin{aligned} \heartsuit := & U_{\Sigma}^{-1} U_{\Sigma} X_0 \left( \prod_{i=0}^{j-1} (I + M X_i(U_{\Sigma} X_0, A_j)^T A_i X_i(U_{\Sigma} X_0, A_j)) \right) \\ & \cdot M X_j(U_{\Sigma} X_0, A_j)^T R_j X_j(U_{\Sigma} X_0, A_j) \\ & \cdot \left( \prod_{i=j+1}^k (I + M X_i(U_{\Sigma} X_0, A_j)^T A_i X_i(U_{\Sigma} X_0, A_j)) \right). \end{aligned}$$

680 We will separately simplify  $\spadesuit$  and  $\heartsuit$ , and verify at the end that summing them recovers the right-  
681 hand-side of (48). We begin with  $\spadesuit$ , and the steps are almost identical to the proof of (43).

$$\begin{aligned} & \spadesuit \\ &= U_{\Sigma}^{-1} \frac{d}{dt} \left( U_{\Sigma} X_0 \prod_{i=0}^k (I + M X_i(U_{\Sigma} X_0, A_j + t R_j)^T A_i X_i(U_{\Sigma} X_0, A_j + t R_j)) \right) \\ &= X_0 \sum_{i=0}^k \left( \prod_{\ell=0}^{i-1} (I + M X_{\ell}(U_{\Sigma} X_0, A_j)^T A_{\ell} X_{\ell}(U_{\Sigma} X_0, A_{\ell})) \right) \\ & \quad \cdot M \frac{d}{dt} (X_i(U_{\Sigma} X_0, A_j + t R_j)^T A_i X_i(U_{\Sigma} X_0, A_j + t R_j)) \\ & \quad \cdot \left( \prod_{\ell=i+1}^k (I + M X_{\ell}(U_{\Sigma} X_0, A_j)^T A_{\ell} X_{\ell}(U_{\Sigma} X_0, A_{\ell})) \right) \\ &\stackrel{(i)}{=} X_0 \sum_{i=0}^k \left( \prod_{\ell=0}^{i-1} (I + M X_{\ell}(X_0, A_j)^T A_{\ell} X_{\ell}(X_0, A_{\ell})) \right) \\ & \quad \cdot M \left( \left( U_{\Sigma}^{-1} \frac{d}{dt} X_i(U_{\Sigma} X_0, A_j + t R_j) \right)^T A_i X_i(X_0, A_j) + M X_i(X_0, A_j)^T A_i \left( U_{\Sigma}^{-1} \frac{d}{dt} X_i(U_{\Sigma} X_0, A_j + t R_j) \right) \right) \\ & \quad \cdot \left( \prod_{\ell=i+1}^k (I + M X_{\ell}(X_0, A_j)^T A_{\ell} X_{\ell}(X_0, A_{\ell})) \right) \\ &\stackrel{(ii)}{=} X_0 \sum_{i=0}^k \left( \prod_{\ell=0}^{i-1} (I + M X_{\ell}(X_0, A_j)^T A_{\ell} X_{\ell}(X_0, A_{\ell})) \right) \\ & \quad \cdot M \left( \left( \frac{d}{dt} X_i(X_0, A_j + t U_{\Sigma}^{\top} R_j U_{\Sigma}) \right)^T A_i X_i(X_0, A_j) + M X_i(X_0, A_j)^T A_i \left( \frac{d}{dt} X_i(X_0, A_j + t U_{\Sigma}^{\top} R_j U_{\Sigma}) \right) \right) \\ & \quad \cdot \left( \prod_{\ell=i+1}^k (I + M X_{\ell}(X_0, A_j)^T A_{\ell} X_{\ell}(X_0, A_{\ell})) \right) \\ &= X_0 \sum_{i=0}^k \left( \prod_{\ell=0}^{i-1} (I + M X_{\ell}(X_0, A_j)^T A_{\ell} X_{\ell}(X_0, A_{\ell})) \right) \\ & \quad \cdot M \frac{d}{dt} (X_i(X_0, A_j + t U_{\Sigma}^{\top} R_j U_{\Sigma})^T A_i X_i(X_0, A_j + t U_{\Sigma}^{\top} R_j U_{\Sigma})) \\ & \quad \cdot \left( \prod_{\ell=i+1}^k (I + M X_{\ell}(X_0, A_j)^T A_{\ell} X_{\ell}(X_0, A_{\ell})) \right) \tag{49} \end{aligned}$$

682 In (i) above, we the following facts: 1.  $X_i(U_{\Sigma} X_0, B_j) = U_{\Sigma} X_i(X_0, B_j)$  from (44), 2.  $A_i = a_i \Sigma^{-1}$ ,  
683 so that  $U_{\Sigma}^{\top} A_i U_{\Sigma} = A_i$ , 3.  $U_{\Sigma} U_{\Sigma}^{-1} = U_{\Sigma}^{-1} U_{\Sigma} = I$ . (ii) follows from (45).

684 We will now simplify  $\heartsuit$ .

$\heartsuit$

$$\begin{aligned}
&= U_{\Sigma}^{-1} U_{\Sigma} X_0 \left( \prod_{i=0}^{j-1} (I + M X_i(U_{\Sigma} X_0, A_j)^T A_i X_i(U_{\Sigma} X_0, A_j)) \right) \\
&\quad \cdot M X_j(U_{\Sigma} X_0, A_j)^T R_j X_j(U_{\Sigma} X_0, A_j) \\
&\quad \cdot \left( \prod_{i=j+1}^k (I + M X_i(U_{\Sigma} X_0, A_j)^T A_i X_i(U_{\Sigma} X_0, A_j)) \right) \\
&\stackrel{(i)}{=} X_0 \left( \prod_{i=0}^{j-1} (I + M X_i(X_0, A_j)^T A_i X_i(X_0, A_j)) \right) M X_j(X_0, A_j)^{\top} U_{\Sigma}^{\top} R_j U_{\Sigma} X_j(X_0, A_j) \\
&\quad \cdot \left( \prod_{i=j+1}^k (I + M X_i(X_0, A_j)^T A_i X_i(X_0, A_j)) \right), \tag{50}
\end{aligned}$$

685 where (i) uses the fact that  $X_i(U_{\Sigma} X_0, B_j) = U_{\Sigma} X_i(X_0, B_j)$  from (44) and the fact that  $A_i =$   
686  $a_i \Sigma^{-1}$ .

687 By expanding  $\frac{d}{dt} G(X_0, A_j + t U_{\Sigma}^{\top} R_j U_{\Sigma})$ , we verify that

$$\frac{d}{dt} G(X_0, A_j + t U_{\Sigma}^{\top} R_j U_{\Sigma}) = (49) + (50) = \spadesuit + \heartsuit = U_{\Sigma}^{-1} \frac{d}{dt} G(U_{\Sigma} X_0, A_j + t R_j),$$

688 this concludes the proof of (48).

689 The remainder of the proof is similar to what was done in (36) in Step 4:

$$\begin{aligned}
&\frac{d}{dt} f(A(t R_j, j), B) \Big|_{t=0} \\
&= 2 \mathbf{E}_{X_0, U} \left[ \text{Tr} \left( (I - M) G(U_{\Sigma} X_0, A_j)^{\top} \Sigma^{-1} \frac{d}{dt} G(U_{\Sigma} X_0, A_j + t R_j) \Big|_{t=0} (I - M) \right) \right] \\
&\stackrel{(i)}{=} 2 \mathbf{E}_{X_0, U} \left[ \text{Tr} \left( (I - M) G(X_0, A_j)^{\top} \Sigma^{-1} \frac{d}{dt} G(X_0, A_j + t U_{\Sigma}^{\top} R_j U_{\Sigma}) \Big|_{t=0} (I - M) \right) \right] \\
&\stackrel{(ii)}{=} 2 \mathbf{E}_{X_0} \left[ \text{Tr} \left( (I - M) G(X_0, A_j)^{\top} \Sigma^{-1} \frac{d}{dt} G(X_0, A_j + t \mathbf{E}_U [U_{\Sigma}^{\top} R_j U_{\Sigma}]) \Big|_{t=0} (I - M) \right) \right] \\
&= 2 \mathbf{E}_{X_0} \left[ \text{Tr} \left( (I - M) G(X_0, A_j)^{\top} \Sigma^{-1} \frac{d}{dt} G(X_0, A_j + t \cdot r_j \Sigma^{-1}) \Big|_{t=0} (I - M) \right) \right] \\
&= \frac{d}{dt} f(A(t \cdot r_j \Sigma^{-1}, j), B) \Big|_{t=0},
\end{aligned}$$

690 where  $r_j := \frac{1}{d} \text{Tr}(\Sigma^{1/2} R_j \Sigma^{1/2})$ . In the above, (i) uses 1. (44) and (48), as well as the fact that  
691  $U_{\Sigma}^{\top} \Sigma^{-1} U_{\Sigma} = \Sigma^{-1}$ . (ii) uses the fact that  $\frac{d}{dt} G(X_0, A_j + t C) \Big|_{t=0}$  is affine in  $C$ . To see this, one  
692 can verify using a simple induction argument, that  $\frac{d}{dt} X_i(X_0, A_j + t C)$  is affine in  $C$  for all  $i$ .  
693 We can then verify from the definition of  $G$ , e.g. using similar algebra as the proof of (48), that  
694  $\frac{d}{dt} G(X_0, A_j + C)$  is affine in  $\frac{d}{dt} X_i(X_0, A_j + t C)$  and  $C$ . Thus  $\mathbf{E}_U [G(X_0, A_j + t U_{\Sigma}^{\top} R_j U_{\Sigma})] =$   
695  $G(X_0, A_j + t \mathbf{E}_U [U_{\Sigma}^{\top} R_j U_{\Sigma}])$ .

696 This concludes the proof of (34), and hence of the whole theorem.

#### 697 B.4 Equivalence under permutation

698 **Lemma 7.** Consider the same setup as Theorem 4. Let  $A = \{A_i\}_{i=0}^k$ , with  $A_i = a_i \Sigma^{-1}$ . Let  
699  $f(A) := f \left( \left\{ Q_i = \begin{bmatrix} A_i & 0 \\ 0 & 0 \end{bmatrix}, P_i = \begin{bmatrix} 0_{d \times d} & 0 \\ 0 & 1 \end{bmatrix} \right\}_{i=0}^k \right)$ . Let  $i, j \in \{0 \dots k\}$  be any two arbitrary  
700 indices, and let  $\tilde{A}_i = A_j$ ,  $\tilde{A}_j = A_i$ , and let  $\tilde{A}_{\ell} = A_{\ell}$  for all  $\ell \in \{0 \dots k\} \setminus \{i, j\}$ . Then  $f(A) = f(\tilde{A})$

701 *Proof.* Following the same setup leading up to (21) in the proof of Theorem 4, we verify that the  
 702 in-context loss is

$$f(A) = \mathbf{E} [\text{Tr} ((I - M) G(X_0, A)^\top \Sigma^{-1} G(X_0, A) (I - M))] ]$$

703 where  $G(X_0, A) := X_0 \prod_{\ell=0}^k (I + M X_0^T A_\ell X_0)$ .

704 Consider any fixed index  $\ell$ . We will show that

$$(I + M X_0^T A_\ell X_0) (I + M X_0^T A_{\ell+1} X_0) = (I + M X_0^T A_{\ell+1} X_0) (I + M X_0^T A_\ell X_0).$$

705 The lemma can then be proven by repeatedly applying the above, so that indices of  $A_i$  and  $A_j$  are  
 706 swapped.

707 To prove the above equality,

$$\begin{aligned} & (I + M X_0^T A_\ell X_0) (I + M X_0^T A_{\ell+1} X_0) \\ &= I + M X_0^T A_\ell X_0 + M X_0^T A_{\ell+1} X_0 + M X_0^T A_\ell X_0 M X_0^T A_{\ell+1} X_0 \\ &= I + M X_0^T A_\ell X_0 + M X_0^T A_{\ell+1} X_0 + M X_0^T a_\ell \Sigma^{-1} X_0 M X_0^T a_{\ell+1} \Sigma^{-1} X_0 \\ &= I + M X_0^T A_\ell X_0 + M X_0^T A_{\ell+1} X_0 + M X_0^T a_{\ell+1} \Sigma^{-1} X_0 M X_0^T a_\ell \Sigma^{-1} X_0 \\ &= (I + M X_0^T A_{\ell+1} X_0) (I + M X_0^T A_\ell X_0). \end{aligned}$$

708 This concludes the proof. Notice that we crucially used the fact that  $A_\ell$  and  $A_{\ell+1}$  are the same matrix  
 709 up to scaling.  $\square$

## 710 C Auxiliary Lemmas

### 711 C.1 Reformulating the in-context loss

712 In this section, we will develop a re-formulation in-context loss, defined in (5), in a more convenient  
 713 form (see Lemma 9).

714 For the entirety of this section, we assume that the transformer parameters  $\{P_i, Q_i\}_{i=0}^k$  are of the  
 715 form defined in (11), which we reproduce below for ease of reference:

$$P_i = \begin{bmatrix} B_i & 0 \\ 0 & 1 \end{bmatrix}, \quad Q_i = \begin{bmatrix} A_i & 0 \\ 0 & 0 \end{bmatrix}.$$

716 Recall the update dynamics in (4), which we reproduce below:

$$Z_{i+1} = Z_i + \frac{1}{n} P Z_i M Z_i^\top Q Z_i, \quad (51)$$

717 where  $M$  is a mask matrix given by  $M := \begin{bmatrix} I_{n \times n} & 0 \\ 0 & 0 \end{bmatrix}$ . Let  $X_k \in \mathbb{R}^{d \times n+1}$  denote the first  $d$  rows  
 718 of  $Z_k$  and let  $Y_k \in \mathbb{R}^{1 \times n+1}$  denote the  $(d+1)^{\text{th}}$  (last) row of  $Z_k$ . Then the dynamics in (51) is  
 719 equivalent to

$$\begin{aligned} X_{i+1} &= X_i + \frac{1}{n} B_i X_i M X_i^\top A_i X_i \\ Y_{i+1} &= Y_i + \frac{1}{n} Y_i M X_i^\top A_i X_i. \end{aligned} \quad (52)$$

720 We present below an equivalent form for the in-context loss from (5):

721 **Lemma 9.** Let  $p_x$  and  $p_w$  denote distributions over  $\mathbb{R}^d$ . Let  $x^{(1)} \dots x^{(n+1)} \stackrel{iid}{\sim} p_x$  and  $w_\star \sim p_w$ . Let  
 722  $Z_0 \in \mathbb{R}^{d+1 \times n+1}$  is specifically defined in (1) as

$$Z_0 = \begin{bmatrix} x^{(1)} & x^{(2)} & \dots & x^{(n)} & x^{(n+1)} \\ y^{(1)} & y^{(2)} & \dots & y^{(n)} & 0 \end{bmatrix} \in \mathbb{R}^{(d+1) \times (n+1)}.$$

Let  $Z_k$  denote the output of the  $(k-1)^{th}$  layer of the linear transformer (as defined in (51), initialized at  $Z_0$ ). Let  $f(\{P_i, Q_i\}_{i=0}^k)$  denote the in-context loss defined in (5), i.e.

$$f(\{P_i, Q_i\}_{i=0}^k) = \mathbf{E}_{(Z_0, w_*)} \left[ \left( [Z_k]_{(d+1), (n+1)} + w_*^\top x^{(n+1)} \right)^2 \right]. \quad (53)$$

Let  $\bar{Z}_0$  be defined as

$$\bar{Z}_0 = \begin{bmatrix} x^{(1)} & x^{(2)} & \dots & x^{(n)} & x^{(n+1)} \\ y^{(1)} & y^{(2)} & \dots & y^{(n)} & y^{(n+1)} \end{bmatrix} \in \mathbb{R}^{(d+1) \times (n+1)},$$

where  $y^{(n+1)} = \langle w_*, x^{(n+1)} \rangle$ . Let  $\bar{Z}_k$  denote the output of the  $(k-1)^{th}$  layer of the linear transformer (as defined in (51), initialized at  $\bar{Z}_0$ ). Assume  $\{P_i, Q_i\}_{i=0}^k$  be of the form in (11). Then the loss in (5) has the equivalent form

$$f(\{A_i, B_i\}_{i=0}^k) = f(\{P_i, Q_i\}_{i=0}^k) = \mathbf{E}_{(\bar{Z}_0, w_*)} \left[ \text{Tr} \left( (I - M) \bar{Y}_k^\top \bar{Y}_k (I - M) \right) \right],$$

where  $\bar{Y}_k \in \mathbb{R}^{1 \times n+1}$  is the  $(d+1)^{th}$  row of  $\bar{Z}_k$ .

Before proving Lemma 9, we first establish an intermediate result (Lemma 10 below). To facilitate discussion, let us define a function  $F_X(\{A_i, B_i\}_{i=0}^k, X_0, Y_0)$  and  $F_Y(\{A_i, B_i\}_{i=0}^k, X_0, Y_0)$  to be the outputs, after  $k$  layers of linear transformers respectively. I.e.

$$\begin{aligned} F_X(\{A_i, B_i\}_{i=0}^k, X_0, Y_0) &= X_{k+1} \\ F_Y(\{A_i, B_i\}_{i=0}^k, X_0, Y_0) &= Y_{k+1}, \end{aligned}$$

as defined in (52), given initialization  $X_0, Y_0$ .

We now prove a useful lemma showing that  $[Y_0]_{n+1} = y^{(n+1)}$  influences  $X_i, Y_i$  in a very simple manner:

**Lemma 10.** Let  $X_i, Y_i$  follow the dynamics in (52). Then

1.  $[X_i]$  is independent of  $[Y_0]_{n+1}$ .
2. For  $j \neq n+1$ ,  $[Y_i]_j$  is independent of  $[Y_0]_{n+1}$ .
3.  $[Y_i]_{n+1}$  depends additively on  $[Y_0]_{n+1}$ .

In other words, for  $C := [0, 0, 0, \dots, 0, c] \in \mathbb{R}^{d+1 \times 1}$ ,

$$\begin{aligned} 1 : F_X(\{A_i, B_i\}_{i=0}^k, X_0, Y_0 + C) &= F_X(\{A_i, B_i\}_{i=0}^k, X_0, Y_0) \\ 2 + 3 : F_Y(\{A_i, B_i\}_{i=0}^k, X_0, Y_0 + C) &= F_Y(\{A_i, B_i\}_{i=0}^k, X_0, Y_0) + C \end{aligned}$$

*Proof of Lemma 10.* The first and second items follows directly from observing that the dynamics for  $X_i$  and  $Y_i$  in (52) do not involve  $[Y_i]_{n+1}$ , due to the effect of  $M$ .

The third item again uses the fact that  $Y_{i+1} - Y_i$  does not depend on  $[Y_i]_{n+1}$ .  $\square$

We are now ready to prove Lemma 9

*Proof of Lemma 9.* Let  $Z_0, Z_k, \bar{Z}_0, \bar{Z}_k$  be as defined in the lemma statement. Let  $\bar{X}_k$  and  $\bar{Y}_k$  denote first  $d$  rows and last row of  $\bar{Z}_k$ . Then by Lemma 10,  $\bar{X}_k = X_k$  and  $\bar{Y}_k = Y_k + [0 \ 0 \ \dots \ 0 \ \langle w_*, x^{(n+1)} \rangle]$ . Therefore, (53) is equivalent to

$$\begin{aligned} & \mathbf{E}_{(\bar{Z}_0, w_*)} \left[ \left( [\bar{Z}_k]_{(d+1), (n+1)} \right)^2 \right] \\ &= \mathbf{E}_{(\bar{Z}_0, w_*)} \left[ \left( [\bar{Y}_k]_{(n+1)} \right)^2 \right] \\ &= \mathbf{E}_{(\bar{Z}_0, w_*)} \left[ \left\| (I - M) \bar{Y}_k^\top \right\|^2 \right] \\ &= \mathbf{E}_{(\bar{Z}_0, w_*)} \left[ \text{Tr} \left( (I - M) \bar{Y}_k^\top \bar{Y}_k (I - M) \right) \right]. \end{aligned}$$

748 This concludes the proof. □

## 749 C.2 Proof of Lemma 2 (Equivalence to Preconditioned Gradient Descent)

750 *Proof of Lemma 2.* Consider fixed samples  $x^{(1)} \dots x^{(n)}$ , and fixed  $w_*$ . Let  $P = \{P_i\}_{i=0}^k$ ,  $Q =$   
 751  $\{Q_i\}_{i=0}^k$  denote fixed weights. Let  $Z_i$  evolve as described in (4). Let  $X_i$  denote the first  $d$  rows of  $Z_k$   
 752 (under (9),  $X_i = X_0$  for all  $i$ ) and let  $Y_i$  denote the  $(d+1)^{th}$  row of  $Z_i$ . Let  $g(x, y, k) : \mathbb{R}^d \times \mathbb{R} \times \mathbb{Z} \rightarrow$   
 753  $\mathbb{R}$  be a function defined as follows: let  $x^{n+1} = x$  and let  $y_0^{n+1} = y$ , then  $g(x, y, k) := y_k^{n+1}$ . Note  
 754 that  $y_k^{n+1} = [Y_k]_{n+1}$ .

755 We verify that, under (9), the formula for updating  $y_k^{(n+1)}$  is given by

$$Y_{k+1} = Y_k - \frac{1}{n} Y_k M X_0^\top A_k X_0.$$

756 where  $M$  is a mask given by  $\begin{bmatrix} I & 0 \\ 0 & 0 \end{bmatrix}$ . We can verify the following facts

1.  $g(x, y, k) = g(x, 0, k) + y$ . To see this, notice first that for all  $i \in \{1 \dots n\}$ ,

$$y_{k+1}^{(i)} = y_k^{(i)} - \frac{1}{n} \sum_{j=1}^n x^{(i)T} A_k x^{(j)} y_k^{(j)}.$$

In other words,  $y_k^{(i)}$  does not depend on  $y_t^{(n+1)}$  for any  $t$ . Next, for  $y_k^{(n+1)}$  itself,

$$y_{k+1}^{(n+1)} = y_k^{(n+1)} - \frac{1}{n} \sum_{j=1}^n x^{(n+1)T} A_k x^{(j)} y_k^{(j)},$$

757 which depends on  $y_k^{n+1}$  only additively. We can verify under a simple induction that  
 758  $g(x, y, k+1) - y = g(x, y, k) - y$ .

759 2.  $g(x, 0, k)$  is linear in  $x$ . To see this, notice first that for  $j \neq n+1$ ,  $y_k^{(j)}$  is does not depend  
 760 on  $x_t^{(n+1)}$  for all  $t, j, k$ . Consequently, the update formula for  $y_{k+1}^{(n+1)}$  depends only linearly  
 761 on  $x^{(n+1)}$  and  $y_k^{(n+1)}$ . Finally,  $y_0^{(n+1)} = 0$  is linear in  $x$ , so the conclusion follows by  
 762 induction.

763 With these two facts in mind, we verify that for each  $k$ , there exists a  $\theta_k \in \mathbb{R}^d$ , such that

$$g(x, y, k) = g(x, 0, k) + y = \langle \theta_k, x \rangle + y$$

764 for all  $x, y$ . It follows from definition that  $g(x, y, 0) = y$ , so that  $\langle \theta_0, x \rangle = g(x, y, 0) - y = 0$ , so  
 765 that  $\theta_0 = 0$ .

766 We now turn our attention to the third crucial fact: for all  $i$ ,

$$g(x^{(i)}, y^{(i)}, k) = y_k^{(i)} = \langle \theta_k, x^{(i)} \rangle + y^{(i)}$$

767 To see this, suppose that we let  $x^{(n+1)} := x^{(i)}$  for some  $i \in 1 \dots n$ . Then

$$y_{k+1}^{(i)} = y_k^{(i)} - \frac{1}{n} \sum_{j=1}^n x^{(i)T} A_k x^{(j)} y_k^{(j)}$$

$$y_{k+1}^{(n+1)} = y_k^{(n+1)} - \frac{1}{n} \sum_{j=1}^n x^{(n+1)T} A_k x^{(j)} y_k^{(j)},$$

768 thus  $y_{k+1}^{(i)} = y_{k+1}^{(n+1)}$  if  $y_k^{(i)} = y_k^{(n+1)}$ , and the induction proof is completed by noting that  $y_0^{(i)} =$   
 769  $y_0^{(n+1)}$  by definition. Let  $\bar{X} \in \mathbb{R}^{d \times n}$  be the matrix whose columns are  $x^{(1)} \dots x^{(n)}$ , leaving out  $x^{(n+1)}$ .  
 770 Let  $\bar{Y}_k \in \mathbb{R}^{1 \times n}$  denote the vector of  $y_k^{(1)} \dots y_k^{(n)}$ . Then it follows that

$$\bar{Y}_k = \bar{Y}_0 + \theta_k^T \bar{X}.$$

771 Using the above fact, the update formula for  $y_k^{(n+1)}$  can be written as

$$\begin{aligned} y_{k+1}^{(n+1)} &= y_k^{(n+1)} - \frac{1}{n} \left\langle A_k X^\top Y_k, x^{(n+1)} \right\rangle \\ \Rightarrow \quad \left\langle \theta_{k+1}, x^{(n+1)} \right\rangle &= \left\langle \theta_k, x^{(n+1)} \right\rangle - \frac{1}{n} \left\langle A_k \bar{X} (\bar{X}^T \theta_k + \bar{Y}_0), x^{(n+1)} \right\rangle \\ &= \left\langle \theta_k, x^{(n+1)} \right\rangle - \frac{1}{n} \left\langle A_k \bar{X} (\bar{X}^T (\theta_k + w_\star)), x^{(n+1)} \right\rangle \end{aligned}$$

772 Since the choice of  $x^{(n+1)}$  is arbitrary, we get the more general update formula

$$\theta_{k+1} = \theta_k - \frac{1}{n} A_k \bar{X} \bar{X}^T (\theta_k + w_\star).$$

773 We can treat  $A_k$  as a preconditioner. Let  $f(\theta) := \frac{1}{2n} (\theta + w_\star)^T \bar{X} \bar{X}^T (\theta + w_\star)$ , then

$$\theta_{k+1} = \theta_k - \frac{1}{n} A_k \nabla f(\theta).$$

774 Finally, let  $w_k^{\text{gd}} := -\theta_k$ . We verify that  $f(-w) = R_{w_\star}(w)$ , so that

$$w_{k+1}^{\text{gd}} = w_k^{\text{gd}} - \frac{1}{n} A_k \nabla R_{w_\star}(w_k^{\text{gd}}).$$

775 We also verify that for any  $x^{(n+1)}$ , the prediction of  $y_k^{(n+1)}$  is

$$g(x^{(n+1)}, y^{(n+1)}, k) = y^{(n+1)} - \left\langle \theta, x^{(n+1)} \right\rangle = y^{(n+1)} + \left\langle w_k^{\text{gd}}, x^{(n+1)} \right\rangle.$$

776 This concludes the proof. □
